1 **Title:  $\beta$ -carotene accelerates resolution of atherosclerosis by promoting regulatory T cell**  
2 **expansion in the atherosclerotic lesion**

3  
4 **Authors: Ivan Pinos<sup>1\*</sup>, Johana Coronel<sup>2\*</sup>, Asma'a Albakri<sup>1\*</sup>, Amparo Blanco<sup>1</sup>, Patrick**  
5 **McQueen<sup>1</sup>, Donald Molina<sup>2</sup>, JaeYoung Sim<sup>2</sup>, Edward A Fisher<sup>3</sup>, Jaume Amengual<sup>1,2</sup>**

6 **Affiliations:**

7 1: Division of Nutritional Sciences, University of Illinois Urbana Champaign, Urbana, IL  
8 2: Department of Food Science and Human Nutrition, University of Illinois Urbana Champaign,  
9 Urbana, IL  
10 3: The Leon H. Charney Division of Cardiology, Department of Medicine, The Marc and Ruti  
11 Bell Program in Vascular Biology, New York University Grossman School of Medicine, NYU  
12 Langone Medical Center, NY

13 \* These authors contributed equally to the work.

14 Corresponding author: [jaume6@illinois.edu](mailto:jaume6@illinois.edu) (J. Amengual)

15 **Funding:** This work was supported by the National Institutes of Health (R01HL147252 to JA)  
16 and the United States Department of Agriculture (W4002 to JA).

17 **ABSTRACT**

18  $\beta$ -carotene oxygenase 1 (BCO1) catalyzes the cleavage of  $\beta$ -carotene to form vitamin A. Besides  
19 its role in vision, vitamin A regulates the expression of genes involved in lipid metabolism and  
20 immune cell differentiation. BCO1 activity is associated with the reduction of plasma cholesterol  
21 in humans and mice, while dietary  $\beta$ -carotene reduces hepatic lipid secretion and delays  
22 atherosclerosis progression in various experimental models. Here we show that  $\beta$ -carotene also  
23 accelerates atherosclerosis resolution in two independent murine models, independently of  
24 changes in body weight gain or plasma lipid profile. Experiments in *Bco1*<sup>-/-</sup> mice implicate  
25 vitamin A production in the effects of  $\beta$ -carotene on atherosclerosis resolution. To explore the  
26 direct implication of dietary  $\beta$ -carotene on regulatory T cells (Tregs) differentiation, we utilized  
27 anti-CD25 monoclonal antibody infusions. Our data show that  $\beta$ -carotene favors Treg expansion  
28 in the plaque, and that the partial inhibition of Tregs mitigates the effect of  $\beta$ -carotene on  
29 atherosclerosis resolution. Our data highlight the potential of  $\beta$ -carotene and BCO1 activity in  
30 the resolution of atherosclerotic cardiovascular disease.

31 **Keywords:** Retinoic acid, forkhead box P3 (FoxP3), inflammation

32

## 33 1. INTRODUCTION

34 Atherosclerotic cardiovascular disease is a progressive pathological process initiated by the  
35 accumulation of cholesterol-rich lipoproteins within the intima layer of the arterial wall. These  
36 particles ultimately lead to the production of chemoattractant cues for circulating monocytes that  
37 transmigrate across the endothelial layer to reach the intima and then differentiate to  
38 macrophages to become cholesterol-laden foam cells. During lesion development, macrophages  
39 promote local inflammation and plaque weakening by degrading extracellular matrix  
40 components such as collagen fibers, which can evolve in the rupture of the lesion and thrombus  
41 formation [1].

42 Conventional therapies aim to lower plasma cholesterol to mitigate the progression of  
43 atherosclerosis. Novel strategies are currently under development to stimulate the resolution of  
44 plaque inflammation more directly, and eventually a reduction in lesion size, in a process named  
45 atherosclerosis regression [2]. Among these strategies, the modulation of CD4<sup>+</sup> regulatory T cells  
46 (Tregs) number is gaining interest over the past years since the discovery that regressing lesions  
47 are enriched in Tregs, where they promote plaque stabilization and repair [3, 4]. Tregs typically  
48 express the surface marker CD25, which has been utilized to target and eliminate Tregs [5, 6].  
49 However, strategies to deplete CD25<sup>+</sup> Tregs do not affect CD25<sup>-</sup> Tregs, which possess similar  
50 immunomodulatory properties as CD25<sup>+</sup> Tregs [7]. Among the different Tregs markers, the  
51 forkhead box P3 (FoxP3) acts as lineage specification factor regulating gene expression of  
52 proteins implicated in the immunosuppressive activity of these cells [8]. Cell culture studies  
53 show that retinoic acid, the transcriptionally active form of vitamin A, promotes Treg  
54 differentiation by upregulating FoxP3 expression [9], however, whether dietary vitamin A affects  
55 Tregs during atherosclerosis development and resolution remains unanswered.

56 Humans obtain vitamin A primarily from  $\beta$ -carotene and other provitamin A carotenoids present  
57 in most fruits and vegetables. Upon absorption, provitamin A carotenoids are cleaved by the  
58 action of  $\beta$ -carotene oxygenase 1 (BCO1), the limiting enzyme in vitamin A formation [10]. Our  
59 data show that the enzymatic activity of BCO1 mediates the bioactive actions of  $\beta$ -carotene in  
60 various preclinical models of obesity and atherosclerosis [11-16]. We showed that the dietary  
61 supplementation with  $\beta$ -carotene delays atherosclerosis progression by reducing cholesterol  
62 hepatic secretion in low-density lipoprotein receptor (LDLR)-deficient (*Ldlr*<sup>-/-</sup>) mice [15]. We  
63 also reported that subjects harboring a genetic variant linked to greater BCO1 activity was  
64 associated with a reduction in plasma cholesterol [17].

65 In this study, we tested the effect of dietary  $\beta$ -carotene on atherosclerosis resolution in two  
66 independent experimental models. We characterized plaque composition by probing for  
67 macrophage and collagen contents, two parameters utilized to characterize atherosclerotic lesions  
68 undergoing resolution [18-21]. Lastly, we utilized *Bco1*<sup>-/-</sup> mice and CD25<sup>+</sup> Treg depletion  
69 experiments in *Foxp3*<sup>EGFP</sup> mice to tease out the direct implications of vitamin A formation and  
70 Tregs on atherosclerosis resolution.

71

72

73

74

75

76

77

78

## 79 **2. METHODS**

### 80 **2.1. Animal husbandry and diets**

81 All procedures were approved by the Institutional Animal Care and Use Committees of the  
82 University of Illinois at Urbana Champaign. For all our studies, we utilized comparable number  
83 of male and female wild-type, *Ldlr*<sup>-/-</sup> (#002207, Jackson Labs, Bar Harbor, ME), *Bco1*<sup>-/-</sup> [11], and  
84 *Foxp3*<sup>EGFP</sup> mice (#006772, Jackson Labs). All mice were in C57BL/6J background. Mice were  
85 kept under controlled temperature and humidity conditions with a 12-hours light/dark cycle and  
86 free access to food and water. Mice were weaned at three weeks of age onto a breeder diet  
87 (Teklad global 18% protein diet: Envigo, Indianapolis, IN) in groups of three to four mice.

88 Control and  $\beta$ -carotene diets contained either placebo beadlets or  $\beta$ -carotene beadlets at a final  
89 concentration of 50 mg  $\beta$ -carotene/kg diet. For reference, the content of  $\beta$ -carotene in carrots is  
90 80 mg/kg (USDA Database). Beadlets were a generous gift from DSM Nutritional Products  
91 (Sisseln, Switzerland). All diets were prepared by Research Diets (New Brunswick, NJ) by cold  
92 extrusion. The exact composition of all the diets used for this study are provided in  
93 Supplementary Table 1. For all the experiments, we stimulated the development of  
94 atherosclerosis with a Western diet deficient in vitamin A (WD-VAD), as done in the past [15,  
95 17].

### 96 **2.2. Blood sampling and tissue collection**

97 Before tissue harvesting, mice were deeply anesthetized by intraperitoneal injection with a  
98 mixture of ketamine and xylazine at 80 and 8 mg/kg body weight, respectively. We collected  
99 blood by cardiac puncture using ethylenediaminetetraacetic acid (EDTA)-coated syringes. We

100 then perfused the mice with 10% sucrose in 0.9% sodium chloride (NaCl)-saline solution prior to  
101 tissue harvesting. Tissues were immediately snap-frozen in liquid nitrogen and kept at -80 °C.  
102 Aortic roots were collected after removing fat under a binocular microscope, embedded in  
103 optimum cutting temperature compound (OCT, Tissue-Tek, Sakura, Torrance, CA) and kept at -  
104 80°C.

### 105 **2.3. Antisense oligonucleotide (ASO) targeting LDLR expression (ASO-LDLR)**

106 To transiently deplete LDLR expression in wild-type, *Bcl1<sup>-/-</sup>*, and *Foxp3<sup>EGFP</sup>* mice, we  
107 administered weekly an intraperitoneal injection containing 5 mg/kg body weight of ASO-LDLR  
108 for a period of 16 weeks. At the end of the treatment, we injected a single dose of 20 mg/kg of  
109 the sense oligonucleotide (SO-LDLR) antidote, which binds and deactivates the ASO-LDLR  
110 [22]. All oligonucleotide treatments were generously provided by Ionis Pharmaceuticals  
111 (Carlsbad, CA).

### 112 **2.4. HPLC analyses of carotenoids and retinoids**

113 Nonpolar compounds were extracted from 100 µl of plasma or 30 mg of liver under a dim yellow  
114 safety light using methanol, acetone, and hexanes. The extracted organic layers were then pooled  
115 and dried in a SpeedVac (Eppendorf, Hamburg, Germany). We performed the HPLC with a  
116 normal phase Zobax Sil (5 µm, 4.6 × 150 mm) column (Agilent, Santa Clara, CA). Isocratic  
117 chromatographic separation was achieved with 10% ethyl acetate/hexane at a flow rate of 1.4  
118 ml/min. For molar quantification of β-carotene and retinoids, we scaled the HPLC with a  
119 standard curve using the parent compound.

## 120 **2.5. Plasma lipid analyses**

121 We measured plasma total cholesterol, cholesterol in the high-density lipoprotein fraction (HDL-  
122 C), and triglyceride levels using commercially available kits (FUJIFILM Wako Diagnostic,  
123 Mountain View, CA), according to the manufacturer's instructions.

## 124 **2.6. RNA isolation and RT-PCR**

125 We isolated the total RNA using TRIzol reagent (Thermo Fisher Scientific, Waltham, MA) and  
126 Direct-zol RNA Miniprep kit (Zymo Research, Irvine, CA) according to the manufacturer's  
127 instructions. RNA was reverse-transcribed to cDNA using high-capacity cDNA reverse  
128 transcription kit (Applied Biosystems, Foster City, CA). Then we used Taqman Master Mix  
129 (Applied Biosystems) to perform RT-PCR using the StepOnePlus RT-PCR system (ABI 7700,  
130 Applied Biosystems). We calculated the relative gene expression using the  $\Delta$ Ct method and  
131 normalized the data to  $\beta$ -actin (*Actb*). Probes (Applied Biosystems) include mouse *Ldlr*  
132 (Mm00440169\_m1), mouse cytochrome P450 26a1 (*Cyp26a1*, Mm00514486\_m1) and mouse  
133 *Actb* (Mm02619580\_g1).

## 134 **2.7. Western blot analysis**

135 For the determination of hepatic levels of LDLR, proteins were extracted from liver lysates in  
136 RIPA buffer (50 mM Tris pH 7.4, 150 mM NaCl, 0.25% sodium deoxycholate, 1% Nonidet P-  
137 40) in the presence of protease inhibitors. Total protein amounts were quantified using the  
138 Pierce® BCA Protein Assay Kit (ThermoFisher Scientific, Waltham, MA). A total of 80  $\mu$ g of  
139 protein homogenate were separated by SDS-PAGE and transferred onto PVDF membranes (Bio-  
140 Rad, Hercules, CA). Membranes were blocked with fat-free milk powder (5% w/v) dissolved in  
141 Tris-buffered saline (15 mM NaCl and 10 mM Tris/HCl, pH 7.5) containing 0.01% Tween 100  
142 (TBS-T), washed, and incubated overnight at 4 °C with mouse anti-LDLR (Santa Cruz

143 Biotechnologies, Dallas, TX) and mouse anti-GAPDH (ThermoFisher Scientific) as a  
144 housekeeping control. Infrared fluorescent-labeled secondary antibodies were prepared at  
145 1:15,000 dilution in TBS-T with 5% fat-free milk powder and incubated for 1 h at room  
146 temperature.

## 147 **2.8. Treg depletion in *Foxp3*<sup>EGFP</sup> mice**

148 To deplete Tregs, mice were injected twice with 250 µg of either the isotype control IgG (Ultra-  
149 LEAFPurified Rat IgG1, λ Isotype Ctrl Antibody no. 401916, Biolegend, CA) or PC61 anti-  
150 CD25 monoclonal antibody (Ultra-LEAF Purified anti-mouse CD25 Antibody no. 102040,  
151 Biolegend, CA). The first treatment took place a day after the administration of SO-LDLR, and  
152 the second injection two weeks after, following established protocols [6].

## 153 **2.9. Monocyte/macrophage trafficking studies**

154 One week before harvesting the baseline group, we injected the mice intraperitoneally with 4  
155 mg/ml of 5-ethynyl-2'-deoxyuridine (EdU) (Invitrogen, Waltham, MA) with the goal of labeling  
156 circulating monocytes to assess macrophage retention among groups. To compare monocyte  
157 recruitment among groups, we labeled circulating monocytes by injecting the mice retro-orbitally  
158 with 1 µm diameter Fluoresbrite flash red plain microspheres beads (Polysciences Inc,  
159 Warrington, PA) diluted in sterile PBS 24 hours before harvesting, regardless of the  
160 experimental group. We assessed the efficiency of EdU and bead labeling by flow cytometry 48  
161 hours and 24 hours after injection by tail bleeding, respectively [23].

## 162 **2.9. Flow cytometry**

163 To assess the number of monocytes labeled with either EdU or fluorescent beads, we incubated  
164 blood samples with red blood cell lysis buffer (Thermo Fisher Scientific, Waltham, MA) and

165 blocked unspecific bindings with using anti-mouse CD16/CD32 (Mouse BD Fc Block, BD  
166 Biosciences, Franklin Lakes, NJ). Cells were then stained with FITC-conjugated anti-mouse  
167 CD45 (BioLegend), PE-conjugated anti-mouse CD115 (BioLegend), and PerCP-conjugated anti-  
168 mouse Ly6C/G (BioLegend, San Diego, CA) for 30 minutes on ice. Cells were fixed,  
169 permeabilized, and stained for EdU using Click-iT EdU Pacific Blue Flow Cytometry Assay Kit  
170 (Invitrogen) following manufacturer's instructions. Beads were detected with the 640-nm red  
171 laser using a 660/20 bandpass filter. Monocyte recruitment and egress was estimated based on  
172 monocyte labeling efficiency, following established protocols [24].

173 For Treg quantifications, spleens were mashed and filtered through a 100  $\mu$ m sterile cell strainer  
174 (Thermo Fisher Scientific). Blood and spleen homogenates were incubated with red blood cell  
175 lysis buffer (Thermo Fisher Scientific) and subsequently blocked with anti-mouse CD16/CD32  
176 (BD Biosciences). We stained the cells with Fixable Viability Dye eFluor 780 (eBioscience, San  
177 Diego, CA) and eFluor 506-conjugated anti-mouse CD45 (BioLegend), PE-conjugated anti-  
178 mouse CD3e (BioLegend), FITC-conjugated anti-mouse CD4 (BioLegend), and BV421-  
179 conjugated anti-mouse CD25 (BioLegend) for 30 minutes on ice. We washed the cells twice  
180 before fixing and permeabilizing cell membranes using the eBioscience FoxP3/Transcription  
181 Factor Staining Buffer Set (Invitrogen) for 1 hour at room temperature, followed by incubation  
182 with Alexa Fluor 647-conjugated anti-mouse FoxP3 antibody (BioLegend) for 30 minutes at  
183 room temperature. All samples were measured on a BD LSR II analyzer (BD Biosciences) and  
184 results were analyzed with the FCS express 5 software (De Novo Software, Pasadena, CA).

## 185 **2.10. Atherosclerotic lesion analysis**

186 Six  $\mu$ m-thick sections were fixed and permeabilized with ice-cold acetone, blocked, and stained  
187 with rat anti-mouse CD68 primary antibody (Bio-Rad, Hercules, CA) followed by biotinylated  
188 rabbit anti-rat IgG secondary antibody (Vector Laboratories, Burlingame, CA). CD68<sup>+</sup> area was  
189 visualized using a Vectastain ABC kit (Vector Laboratories). Sections were then counterstained



190 with hematoxylin, dehydrated in an ethanol gradient, xylene, and mounted with Permount  
191 medium (Thermo Fisher Scientific). Images were acquired using Axioskop 40 microscope (Carl  
192 Zeiss, Jena, Germany). For collagen content, frozen sections were fixed and stained using  
193 picrosirius red (Polysciences). Sections were scanned using the Axioscan.Z1 microscope (Carl  
194 Zeiss) using both bright field and polarized light. Total lesion area, CD68+, and collagen+ areas  
195 were quantified using ImageJ software (NIH).

## 196 **2.11. Statistical Analysis**

197 Data represented as bar charts are expressed as mean  $\pm$  standard error of the mean (SEM). Data  
198 were analyzed using GraphPad Prism software (GraphPad Software Inc., San Diego, CA) by  
199 one-way ANOVA, followed by Tukey's multiple comparisons test. Differences between groups  
200 were considered significant with an adjusted P value  $< 0.05$ . The relationship between the two  
201 dependent factors, CD68 and collagen contents, and group differences were evaluated by  
202 descriptive discriminant analysis. Briefly, models were fitted under null and alternative  
203 hypotheses and goodness of fit was evaluated using the Likelihood Ratio Test with randomized  
204 inference (bootstrap;  $n = 1000$  simulations). Simultaneous hypothesis testing was corrected using  
205 the Benjamini-Hochberg procedure [24]. The resulting False Discovery Rate (FDR) was  
206 considered significant with a cut-off  $< 0.05$ .

207

208

209

210

211

212

213

214

215  
216  
217  
218  
219  
220  
221  
222  
223  
224  
225  
226  
227  
228  
229  
230  
231  
232  
233  
234  
235  
236  
237  
238

### **3. Results**

#### **3.1. $\beta$ -carotene supplementation accelerates atherosclerosis resolution**

We recently showed that dietary  $\beta$ -carotene delays atherosclerosis progression in *Ldlr*<sup>-/-</sup> mice [15], which prompted us to examine whether  $\beta$ -carotene also impacts the resolution of inflammation in complex atherosclerotic lesions. To achieve these lesions, we utilized two distinct mouse models of atherosclerosis in combination with WD-VAD. In our first model, we established LDLR deficiency in wild-type mice by injecting ASO-LDLR weekly for a period of 16 weeks. The characteristics of the plaques before undergoing resolution were established by sacrificing a subset of mice after 16 weeks on diet (Baseline). The remaining mice were injected once with SO-LDLR to promote atherosclerosis resolution and divided into two groups fed either WD-VAD (Resolution - Control) or WD- $\beta$ -carotene (Resolution -  $\beta$ -carotene). Mice were harvested three weeks after SO-LDLR injections (Figure 1A).

Male mice gained more weight than female mice, although we did not observe differences between the three experimental groups (Supplementary Figure 1A). For the remaining outcomes (plasma lipid profile, retinoid levels, and plaque composition), we did not observe sex differences in any of our experiments, and therefore, we combined results from both sexes. In comparison to Baseline mice, both Resolution groups showed drastic reduction in total plasma cholesterol and triglyceride levels, while HDL-C levels remained constant between groups (Figure 1B). Lipid normalization was accompanied by the upregulation of hepatic LDLR expression at the mRNA and protein levels (Figure 1C, D).

239 Despite mice being fed a WD-VAD for several weeks, HPLC measurements of circulating  
240 vitamin A and hepatic retinoid stores ruled out vitamin A deficiency in any of the experimental  
241 groups (Figure 1E, F). However, mice fed WD- $\beta$ -carotene showed an increase in hepatic vitamin  
242 A content in comparison to those fed WD-VAD, which was mediated by the conversion of  $\beta$ -  
243 carotene to vitamin A (Figure 1F). Hepatic *Cyp26a1* expression, which is commonly utilized as a  
244 surrogate marker of vitamin A and retinoic acid production [25, 26], appeared upregulated in  
245 response to WD- $\beta$ -carotene (Supplementary Figure 1B).

246 To determine the effect of  $\beta$ -carotene supplementation on atherosclerosis resolution, we  
247 examined lesion size and composition at the level of the aortic root (Figure 1G). Lesion area  
248 remained constant among the three experimental groups, as previously reported in mice treated  
249 with ASO-LDLR under similar experimental conditions (Figure 1H) [27]. We next examined  
250 plaque composition by focusing on two parameters commonly utilized as a surrogate indicators  
251 of atherosclerosis resolution: CD68<sup>+</sup> area, a myeloid (macrophage) marker that represents plaque  
252 inflammation, and collagen area, a marker of plaque stability in humans [28, 29]. In comparison  
253 to Baseline mice, the lesions of Resolution – Control and Resolution -  $\beta$ -carotene groups  
254 presented a reduction in CD68 content of approximately 36% and 45%, respectively (Figure 1I).  
255 The collagen content in lesions increased in both Resolution groups in comparison to Baseline,  
256 reaching statistical significance only in the  $\beta$ -carotene-fed mice. In this group, we observed  
257 215% and 60% increase in collagen content compared to the Baseline and the Resolution -  
258 Control groups, respectively (Figure 1J). Lastly, we plotted the relative CD68 and collagen  
259 contents in the lesion to perform a descriptive discriminant analysis. Individual samples from  
260 three distinct experimental groups clustered together, highlighting significant differences  
261 between the three experimental groups for all the comparisons (Figure 1K).

262 To validate the results obtained in our ASO-LDLR reversible model of atherosclerosis, we  
263 utilized *Ldlr*<sup>-/-</sup> mice fed WD-VAD subjected to a dietary switch strategy to lower cholesterol in  
264 plasma and promote atherosclerosis resolution [18, 30]. Baseline *Ldlr*<sup>-/-</sup> mice were harvested after  
265 12 weeks on WD-VAD, while the remaining animals were switched to either a Standard diet  
266 without vitamin A (Resolution - Control) or the same diet supplemented with  $\beta$ -carotene  
267 (Resolution -  $\beta$ -carotene) for four more weeks. To prevent changes in food intake due to  
268 consistency and hardness of the feed, we provided Standard diets as powder. This approach  
269 prevented a reduction in body weight, which could have resulted in confounding alterations in  
270 atherosclerosis resolution (Supplementary Figure 2A).

271 *Ldlr*<sup>-/-</sup> mice undergoing Resolution presented a reduction in total plasma cholesterol and  
272 triglyceride levels in comparison to Baseline mice. We did not observe changes in HDL-C levels  
273 between the three experimental groups (Figure 2A). Systemic and hepatic vitamin A levels failed  
274 to show indications of vitamin A deficiency, and hepatic vitamin A stores increased in  $\beta$ -  
275 carotene-fed mice (Supplementary Figure 2B).

276 We next characterized atherosclerotic lesions at the level of the aortic root (Figure 2B). Lesion  
277 size area was comparable between experimental groups (Figure 2C), although CD68 content  
278 decreased to the same extent in both Resolution groups in comparison to Baseline mice (Figure  
279 2D). In comparison to the Baseline group, collagen accumulation in the lesion increased 100% in  
280 the Resolution - Control and over 200% in the Resolution -  $\beta$ -carotene group, respectively  
281 (Figure 2E). Descriptive discriminant analysis showed comparable results to those observed for  
282 our ASO-LDLR model, where differences between the three experimental groups reached  
283 statistical significance (Figure 2F).

284 Together, these data show that  $\beta$ -carotene supplementation during atherosclerosis resolution  
285 results in the improvement of lesion composition in two independent mouse models.

### 286 **3.2. BCO1 drives the effect of $\beta$ -carotene on atherosclerosis resolution**

287 To establish the contribution of BCO1 on the effect of  $\beta$ -carotene on atherosclerosis resolution,  
288 we utilized LDLR-ASO to promote atherogenesis in *Bco1*<sup>-/-</sup> mice following the same  
289 experimental approach described for wild-type mice (Figure 1A). Consistent with our results in  
290 wild-type mice, plasma cholesterol levels in both Resolution groups decreased in comparison to  
291 Baseline mice, while vitamin A measurements ruled out vitamin A deficiency (Supplementary  
292 Figure 3). The accumulation of  $\beta$ -carotene in tissues and plasma is characteristic in *Bco1*<sup>-/-</sup> mice  
293 [11]. Indeed, HPLC quantification of  $\beta$ -carotene in plasma and liver of *Bco1*<sup>-/-</sup> Resolution -  $\beta$ -  
294 carotene mice presented four-fold and 400-fold greater  $\beta$ -carotene levels found in wild-type  
295 Resolution -  $\beta$ -carotene, respectively (Figure 3A, B).

296 The characterization of the atherosclerotic lesions showed no alterations in lesion size between  
297 the three experimental groups (Figure 3C, D). When compared to Baseline mice, both Resolution  
298 groups displayed lower CD68 and higher collagen contents, although we didn't observe  
299 differences in CD68 and collagen contents between both Resolution groups (Figure 3E, F).  
300 Descriptive discriminant analysis highlighted differences between Baseline *Bco1*<sup>-/-</sup> mice and their  
301 Resolution littermates, independently of the presence of  $\beta$ -carotene in the diet (Figure 3G).

### 302 **3.3. Effect of $\beta$ -carotene and anti-CD25 depletion on Treg cell number**

303 Our data show that  $\beta$ -carotene favors atherosclerosis resolution in two independent mouse  
304 models (Figure 1K, 2F), and results in *Bco1*<sup>-/-</sup> mice directly implicate vitamin A formation in this  
305 process (Figure 3G). Retinoic acid is the transcriptionally active form of vitamin A and promotes  
306 Treg differentiation by upregulating FoxP3 expression in various experimental models [31-36].  
307 Treg number decreases in developing lesions and increases during atherosclerosis resolution [6,

308 37, 38], but whether the dietary manipulation of  $\beta$ -carotene or vitamin A affects Treg number  
309 during atherosclerosis remains unanswered. To investigate whether the Tregs are responsible for  
310 the effect of dietary  $\beta$ -carotene on atherosclerosis resolution, we induced atherosclerosis in  
311 *Foxp3<sup>EGFP</sup>* mice by injecting ASO-LDLR as described above (Figure 1 and 3). *Foxp3<sup>EGFP</sup>* mice  
312 co-express EGFP and FoxP3 under the regulation of the endogenous FoxP3 promoter [39]. After  
313 16 weeks on diet, mice undergoing resolution were treated twice with either the PC61 anti-CD25  
314 monoclonal antibody (anti-CD25) or an isotype control (IgG) (Figure 4A) [6]. We did not  
315 observe changes in body weight among groups, and the three groups undergoing resolution  
316 showed a normalization in plasma lipids in comparison to Baseline controls (data not shown).  
317 Flow cytometry analyses demonstrated the effectiveness of the anti-CD25 treatment by reducing  
318 the ratio of circulating and splenic CD25<sup>+</sup>FoxP3<sup>+</sup> (CD25<sup>+</sup> Tregs) in comparison to the other  
319 experimental groups (Figure 4B-D). We also observed a depletion of CD25<sup>+</sup> Tregs and  
320 CD25<sup>+</sup>FoxP3<sup>-</sup> T cells in the lesion and lymph nodes (Figure 4E, F), in agreement with previous  
321 reports showing that anti-CD25 fails to completely deplete CD25<sup>-</sup>FoxP3<sup>+</sup> Tregs (CD25<sup>-</sup> Tregs),  
322 which retain strong anti-inflammatory properties [7]. Hence, we quantified the number of total  
323 Tregs independently of the presence of CD25 by counting the number of GFP/FoxP3/DAPI triple  
324 positive cells (Figure 4G). All the groups undergoing Resolution presented a greater total Treg  
325 number than Baseline mice, although the results did not reach statistical significance between  
326 Baseline and Resolution - Control group ( $P = 0.10$ ). Resolution -  $\beta$ -carotene injected with IgG  
327 presented the highest Treg cell number among all the other experimental groups, suggesting that  
328 dietary  $\beta$ -carotene favors Treg expansion in the plaque (Figure 4H).  
329 Circulating total Treg number remained constant, but we observed a slight decrease in the  
330 number of splenic total Tregs in mice undergoing Resolution in comparison to Baseline mice.

331 This reduction was more pronounced in the Resolution –  $\beta$ -carotene mice + anti-CD25  
332 (Supplementary Figure 4A, B). The number of circulating CD25<sup>-</sup> Tregs increased in the  
333 Resolution –  $\beta$ -carotene mice + anti-CD25 group in comparison to Baseline mice, remaining  
334 constant in the spleen among all groups (Supplementary Figure 4C, D).

### 335 **3.4. Anti-CD25 treatment partially abrogates the effect of $\beta$ -carotene on atherosclerosis** 336 **resolution**

337 Tregs possess strong anti-inflammatory properties independently of the presence of CD25 [7,  
338 40], and play an important role on plaque remodeling during atherosclerosis regression [6].  
339 Hence, we evaluated plaque composition in our *Foxp3<sup>EGFP</sup>* mice (Figure 5A). As expected, all  
340 experimental groups showed comparable lesion size at the level of the aortic root (Figure 5B).  
341 Mice in the Resolution –  $\beta$ -carotene + IgG group displayed a reduction in CD68 content in the  
342 lesion of approximately 50% in comparison to Baseline mice. Resolution – Control + IgG and  
343 Resolution –  $\beta$ -carotene + anti-CD25 groups showed a 30% reduction in comparison to Baseline  
344 mice, although only the former reached statistical significance (Figure 5C). Collagen content in  
345 the lesion of Resolution –  $\beta$ -carotene + IgG mice was significantly higher in comparison to any  
346 other experimental group. Resolution Control + IgG and Resolution -  $\beta$ -carotene + Anti-CD25  
347 showed comparable results, while Baseline mice had the lowest collagen content among all the  
348 groups (Figure 5D).

349 We next performed a descriptive discriminant analysis to examine pairwise comparisons between  
350 our four experimental groups. The Baseline group was significantly different in comparison to all  
351 the Resolution counterparts. Resolution -  $\beta$ -carotene + IgG mice were different from their  
352 Resolution – Control + IgG, as we observed in our two previous resolution experiments (Figure  
353 1K and 2F). We did not observe statistical differences when we compared Resolution -  $\beta$ -

354 carotene + anti-CD25 to Resolution - Control + IgG (FDR = 0.38) or Resolution -  $\beta$ -carotene +  
355 IgG to (FDR = 0.10) (Figure 5E).

356 The presence of anti-inflammatory macrophages in the lesions, together with a net egress of pro-  
357 inflammatory macrophages are key features of atherosclerosis resolution [41]. We quantified  
358 arginase 1 content in the lesion, a key anti-inflammatory marker in mice during regression that is  
359 synergistically upregulated in anti-inflammatory macrophages exposed to retinoic acid [42, 43]  
360 (Figure 5F). Only those mice fed  $\beta$ -carotene, independent of the injection with IgG or anti-CD25,  
361 showed an upregulation of arginase 1 in the lesion (Figure 5G). We also evaluated macrophage  
362 egress by injecting a single dose of EdU a week before sacrificing the Baseline mice (see  
363 methods for details) (Figure 5H). Only those mice fed  $\beta$ -carotene, independent of the antibody  
364 treatment, displayed a greater egress in comparison to Baseline mice (Figure 5I). We did not  
365 observe changes in monocyte recruitment evaluated by injecting fluorescently labeled beads 24 h  
366 before the sacrifice (Figure 5J, K), nor changes in  $Ki67^+CD68^+$  cells, as an indicator of  
367 macrophage proliferation in the lesion (Figure 5L, M).

368

369

370

371

372

373

374

375

376

377

378



379

380

381

#### 382 **4. Discussion**

383 Seminal studies showed that  $\beta$ -carotene delays atherosclerosis progression in various  
384 experimental models by reducing plasma cholesterol levels [44-46]. In 2020, we demonstrated  
385 that these effects depend on BCO1 activity in mice, and that a genetic variant in the *BCO1* gene  
386 is associated with a reduction in plasma cholesterol levels in people [15, 17]. Our study shows  
387 that  $\beta$ -carotene promotes atherosclerosis resolution in two independent experimental models in a  
388 BCO1-dependent manner. Treg depletion studies revealed that dietary  $\beta$ -carotene favors Treg  
389 expansion in resolving lesions. Together, these findings identify dietary  $\beta$ -carotene and its  
390 conversion to vitamin A as a promising strategy to ameliorate plaque burden not only by  
391 delaying atherosclerosis progression, but also by reversing atherosclerosis inflammation.

392 Carotenoids are the main source of vitamin A in human diet, and the only source of this vitamin  
393 in strict vegetarians [47]. Among those carotenoids with provitamin A activity,  $\beta$ -carotene is the  
394 most abundant in our diet and the only compound capable of producing two vitamin A  
395 molecules. Vitamin A is required for vision, embryo development, and immune cell maturation,  
396 making  $\beta$ -carotene a crucial nutrient for human health [48]. Unlike preformed vitamin A, the  
397 intestinal uptake of carotenoids is a protein-mediated process that depends on vitamin A status.  
398 This regulatory mechanism prevents the excessive uptake of provitamin A carotenoids,  
399 contributing to preventing vitamin A toxicity [49, 50].

400 BCO1 is the only enzyme in mammals capable of synthesizing vitamin A from carotenoids [10,  
401 12]. Therefore, it is not surprising that SNPs in the *BCO1* gene are associated to alterations in  
402 circulating carotenoids including  $\beta$ -carotene [51-53]. We recently described that subjects

403 harboring at least a copy of rs6564851-T allele, which increases BCO1 activity [54], show a  
404 reduction in total cholesterol and non-HDL-C in comparison to those with two copies of the  
405 rs6564851-G variant [17]. A recent study revealed that this variant is also associated with  
406 triglyceride levels in middle-aged individuals [55], implicating BCO1 activity as a novel  
407 regulator of plasma lipid profile. These studies provide a clinical relevance to studies performed  
408 in rodents and rabbits in which  $\beta$ -carotene-rich diets reduce plasma cholesterol and mitigate the  
409 development of atherosclerosis [15, 44-46].

410 Carotenoids, including  $\beta$ -carotene, possess antioxidant properties in lipid-rich environments [56].  
411 The development of *Bco1*<sup>-/-</sup> mice contributed to solving a long-lasting controversy in the  
412 carotenoid field by dissecting the biological effects of intact  $\beta$ -carotene and its role in vitamin A  
413 formation. When *Bco1*<sup>-/-</sup> mice are fed  $\beta$ -carotene, these mice accumulate large amounts of this  
414 compound in tissues and plasma [11]. In 2011, we reported that wild-type mice fed  $\beta$ -carotene  
415 exhibited a reduction in adipose tissue size. *Bco1*<sup>-/-</sup> mice subjected to the same experimental  
416 conditions did not show differences in adipose tissue size in comparison to control-fed mice  
417 despite accumulating large amounts of  $\beta$ -carotene in this tissue [16]. We recently over-expressed  
418 BCO1 in the adipose tissue of *Bco1*<sup>-/-</sup> mice fed  $\beta$ -carotene. Under these conditions, we observed  
419 an increase in vitamin A levels including retinoic acid, and a reduction of adipose tissue size  
420 [16]. These effects are in line with those reported by Palou's group utilizing both dietary vitamin  
421 A and retinoic acid supplementation, which promotes fatty acid oxidation and thermogenesis in  
422 various experimental models [57-67].

423 In 2020, we confirmed the implication of BCO1 activity and vitamin A in the development of  
424 atherosclerosis. We compared the effect of  $\beta$ -carotene on *Ldlr*<sup>-/-</sup> and *Ldlr*<sup>-/-</sup>*Bco1*<sup>-/-</sup> mice using the  
425 same experimental diets utilized in this study (Supplementary Table 1). In alignment with our

426 clinical data,  $\beta$ -carotene reduced total cholesterol and non-HDL-C in *Ldlr*<sup>-/-</sup> mice, but not in *Ldlr*<sup>-/-</sup>  
427 *Bco1*<sup>-/-</sup> mice [15, 17]. Direct administration of retinoic acid caused a reduction in cholesterol  
428 and triglyceride secretion in both cultured hepatocytes and mice, while bone marrow transplant  
429 experiments showed a moderate effect of BCO1 activity in myeloid cells [15]. Whether BCO1  
430 activity is associated with the development of atherosclerotic cardiovascular disease in humans,  
431 however, remains unexplored.

432 Besides its effects on lipid metabolism, retinoic acid modulates immune cell function [68].  
433 Exogenous retinoic acid promotes alternative macrophage activation in various cell culture  
434 models, and skews naïve T cells to anti-inflammatory Tregs by directly upregulating the  
435 transcription factor FoxP3 [69, 70]. The expression of FoxP3 is necessary and sufficient for the  
436 anti-inflammatory phenotype of Tregs [8, 71]. Studies carried out by Loke's group highlighted  
437 the interplay between alternative macrophage activation and Treg differentiation, a process that  
438 was proposed to be mediated by the production and release of retinoic acid by the macrophage  
439 [33, 36]. This hypothesis has not been demonstrated to date, partially due to the technical  
440 difficulty to quantify retinoic acid production in biological samples [72]. We recently overcame  
441 this limitation and demonstrated for the first time that alternatively-activated macrophages  
442 produce and release retinoic acid in a STAT6-dependent manner [43]. We also demonstrated that  
443 exogenous retinoic synergizes with interleukin 4 (IL4) to stimulate the expression of anti-  
444 inflammatory genes in the macrophage, including arginase 1. More importantly, we observed  
445 that macrophages exposed to both retinoic acid and IL4 displayed greater efferocytosis and  
446 lysosomal activities than those exposed to IL4 or retinoic acid alone [43]. These results indicate  
447 that the combination of retinoic acid with anti-inflammatory signals typically present during  
448 inflammatory resolution such as IL4 could favor atherosclerosis resolution. It remains

449 unanswered whether retinoic acid released by the macrophage is sufficient to skew naïve T cells  
450 to Tregs in the lesion by upregulating FoxP3 expression alone.

451 Our experiment using *Foxp3*<sup>EGFP</sup> mice show that  $\beta$ -carotene supplementation caused Treg  
452 expansion in regressing lesions. To our knowledge, this is the first report showing that a dietary  
453 intervention with a nutrient administered at physiological concentrations can modulate Treg  
454 levels in the atherosclerotic lesion. As a reference, our diets were supplemented with 50 mg of  $\beta$ -  
455 carotene/kg in comparison to 80 mg of  $\beta$ -carotene/kg in carrots (USDA Database). Additionally,  
456 we provided these diets in mice that were not deficient in vitamin A, as our HPLC data show  
457 (Figure 1E, F and Supplementary Figure 2B, C), for a relatively short period of time (3 or 4  
458 weeks).

459 To establish a direct link between the effect of  $\beta$ -carotene supplementation and Tregs in our  
460 experimental model, we decided to deplete Tregs in *Foxp3*<sup>EGFP</sup> mice by infusing them with anti-  
461 CD25, following Sharma and colleagues' approach [6]. However, our data show that this  
462 strategy failed to completely deplete Tregs, as previously reported by other investigators [7, 40].  
463 CD25<sup>-</sup> Tregs remained in circulation and tissues including aortic lesions (Figure 4E-H and  
464 Supplementary Figure 4). It is possible that the conversion of  $\beta$ -carotene to retinoic acid favored  
465 Treg expansion by specifically favoring CD25<sup>-</sup> Treg proliferation, which are insensitive to anti-  
466 CD25. Whether  $\beta$ -carotene supplementation during atherosclerosis resolution alters Treg content  
467 in other organs and disease models were outside of the scope of this study. For example, an  
468 increase in Treg number in developing tumors could result in the reprogramming of pro-  
469 inflammatory macrophages towards resolving macrophages that could contribute to tumor  
470 expansion [73]. In summary, partial Treg depletion was sufficient to mitigate the effects of  $\beta$ -

471 carotene on plaque composition during the resolution of atherosclerosis, providing a direct link  
472 between  $\beta$ -carotene and Treg number (Figure 5A-G).

473 Another question remains unanswered: What is the source of vitamin A that favors Treg  
474 expansion in the lesion? Our HPLC analyses show that circulating  $\beta$ -carotene in wild-type mice  
475 is marginal, although hepatic vitamin A stores highlight an increase in vitamin A formation  
476 (Figure 1F and Figure 3A, B). It is not clear whether naïve T cells express BCO1, which would  
477 enable them to locally produce vitamin A and its derivative retinoic acid. Previous work has  
478 related tissue macrophages as the responsible for retinoic acid production and suggested that  
479 these cells would release it to signal nearby naïve T cells that in turn, could differentiate into  
480 Tregs. Retinoic acid could be originated from  $\beta$ -carotene or retinol/retinyl esters stored in the  
481 cell, although our RNA sequencing analysis revealed that BCO1 expression in plaque  
482 macrophages is relatively limited [15]. Plaque macrophages, and T cells in a lesser extent,  
483 express various scavenger receptors that have been linked to the uptake of retinoids and  
484 carotenoids such as the scavenger receptor class BI, lipoprotein lipase and the cluster of  
485 differentiation 36 [74]. Determining whether naïve T cells rely on plaque macrophages to obtain  
486 retinoids and activate FoxP3 to differentiate into Treg is not clear to this day.

487 In summary, we report for the first time that vitamin A production from  $\beta$ -carotene favors Treg  
488 expansion in the atherosclerotic lesion, a process that contributes to atherosclerosis resolution.  
489 Together with the cholesterol-lowering effects of  $\beta$ -carotene described in the past, unveils a dual  
490 role of dietary  $\beta$ -carotene and the enzyme BCO1: (1) BCO1 delays atherosclerosis progression  
491 by reducing plasma cholesterol, and (2) favor atherosclerosis resolution by modulating Treg  
492 levels and macrophage polarization status.

493

494

495

496

## 497 Figures

498

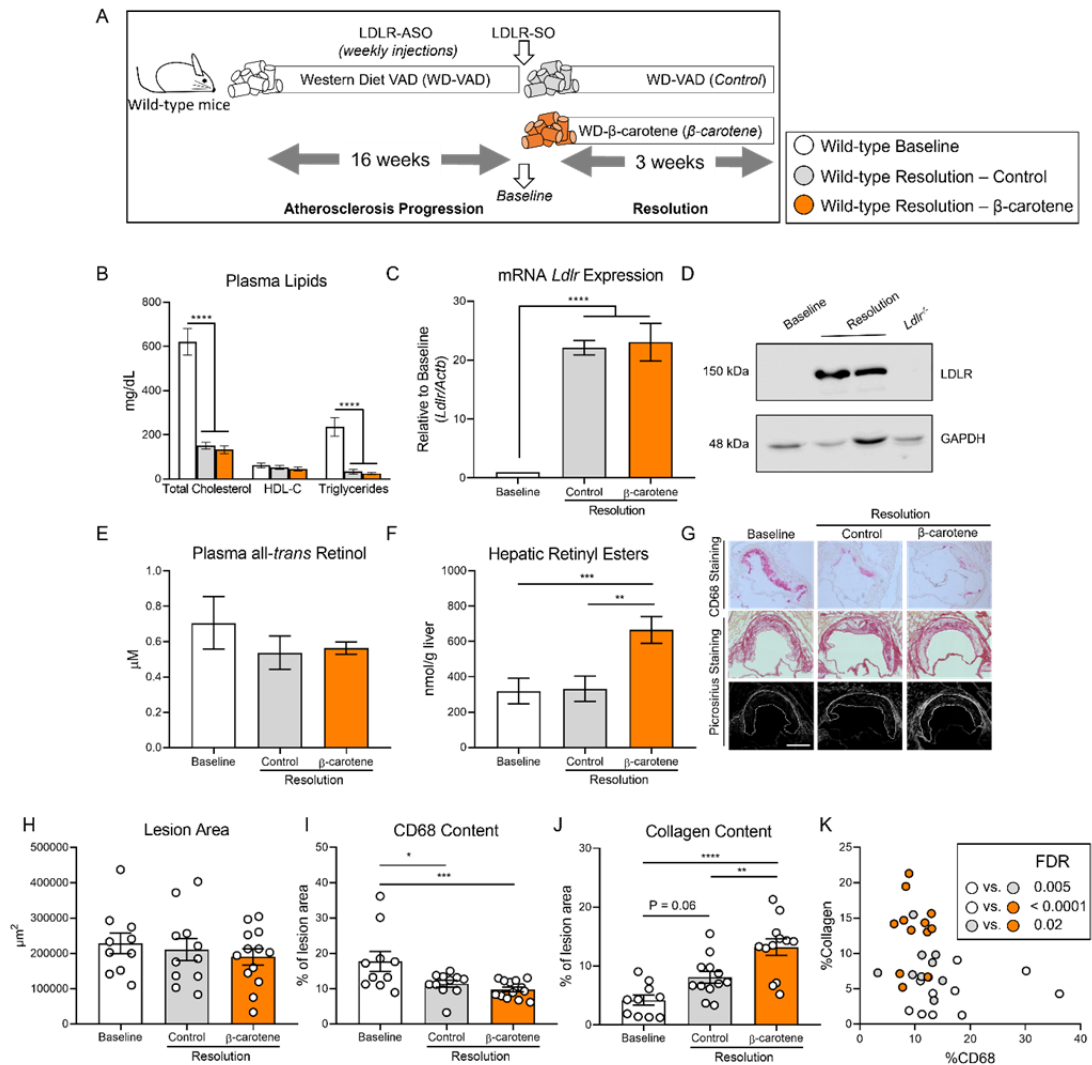

499

500

501 **Figure 1.  $\beta$ -carotene accelerates atherosclerosis resolution in wild-type mice infused with**  
 502 **anti-sense oligonucleotide targeting the low-density lipoprotein receptor (ASO-LDLR). (A)**

503 Four-week-old male and female wild-type mice were fed a purified Western diet deficient in

504 vitamin A (WD-VAD) and injected with antisense oligonucleotide targeting the low-density  
505 lipoprotein receptor (ASO-LDLR) once a week for 16 weeks to induce atherosclerosis. After 16  
506 weeks, a group of mice was harvested (Baseline) and the rest of the mice were injected once with  
507 sense oligonucleotide (SO-LDLR) to inactivate ASO-LDLR and promote atherosclerosis  
508 resolution. Mice undergoing resolution were either kept on the same diet (Resolution - Control)  
509 or switched to a Western diet supplemented with 50 mg/kg of  $\beta$ -carotene (Resolution -  $\beta$ -  
510 carotene) for three more weeks. **(B)** Plasma lipid levels at the moment of the sacrifice. **(C)**  
511 Relative LDLR mRNA, and **(D)** protein expressions in the liver. **(E)** Circulating vitamin A (all-  
512 *trans* retinol), and **(F)** hepatic retinyl ester stores determined by HPLC. **(G)** Representative  
513 images for macrophage (CD68+, top panels), and picrosirius staining to identify collagen using  
514 the bright-field (middle panels) or polarized light (bottom panels). **(H)** Plaque size, **(I)** relative  
515 CD68 content, and **(J)** collagen content in the lesion. **(K)** Descriptive discriminant analysis  
516 employing the relative CD68 and collagen contents in the lesion as variables highlighting the  
517 FDR for each comparison. Each dot in the plot represents an individual mouse (n = 10 to  
518 12/group). **(B-J)** Values are represented as means  $\pm$  SEM. Statistical differences were evaluated  
519 using one-way ANOVA with Tukey's multiple comparisons test. Differences between groups  
520 were considered significant with a p-value < 0.05. \* p < 0.05; \*\* p < 0.01; \*\*\* p < 0.005; \*\*\*\* p  
521 < 0.001. Size bar = 200  $\mu$ m.

522  
523  
524  
525  
526  
527  
528  
529  
530

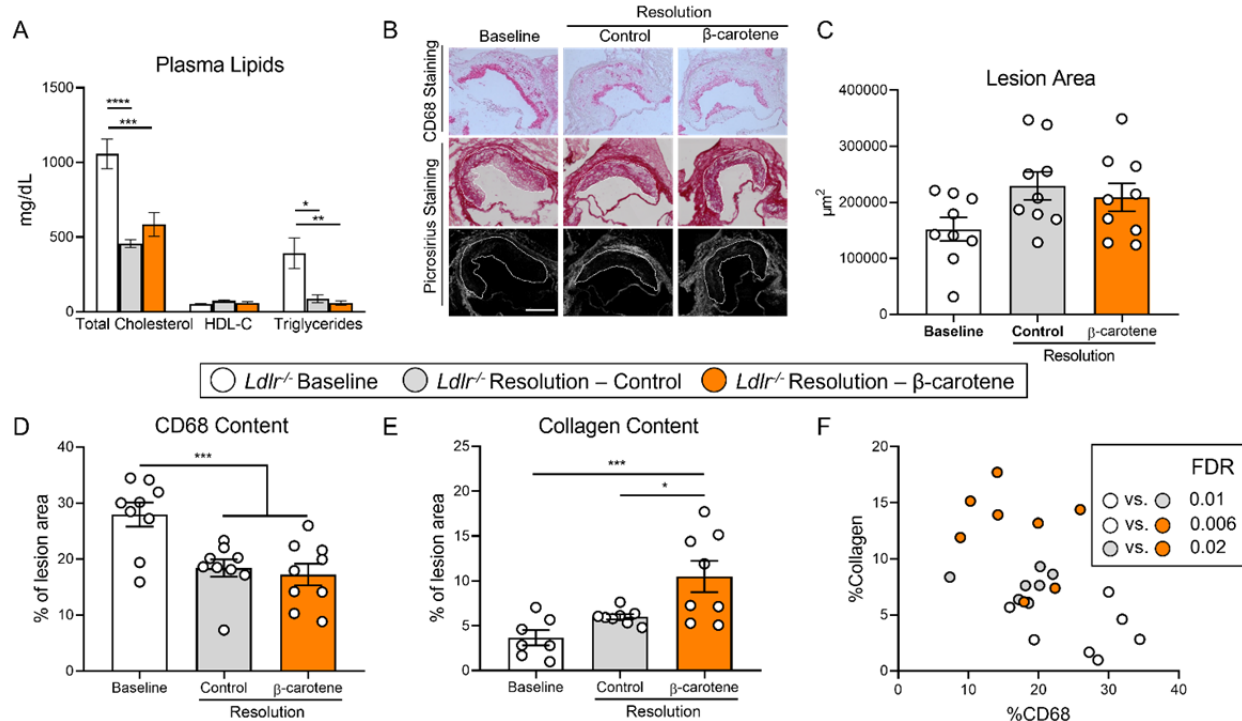

531  
532  
533  
534  
535  
536  
537  
538  
539  
540  
541  
542  
543  
544  
545  
546  
547  
548

**Figure 2.  $\beta$ -carotene accelerates atherosclerosis resolution in low-density lipoprotein**

**deficient ( $Ldlr^{-/-}$ ) mice subjected to dietary switch.** Four-week-old male and female  $Ldlr^{-/-}$  mice

were fed a purified Western diet deficient in vitamin A (WD-VAD) for 12 weeks to induce atherosclerosis. After 12 weeks, a group of mice was harvested (Baseline) and the rest of the mice were switched to a Standard diet (Resolution-Control) or the same diet supplemented with 50 mg/kg of  $\beta$ -carotene (Resolution- $\beta$ -carotene) for four more weeks. (A) Total cholesterol plasma levels at the moment of the sacrifice. (B) Representative images for macrophage (CD68+, top panels), and picrosirius staining to identify collagen using the bright-field (middle panels) or polarized light (bottom panels). (C) Plaque size, (D) relative CD68 content, and (E) collagen content in the lesion. (F) Descriptive discriminant analysis employing the relative CD68 and collagen contents in the lesion as variables highlighting the FDR for each comparison. Each dot in the plot represents an individual mouse (n = 9 to 12/group). (A-E) Values are represented as means  $\pm$  SEM. Statistical differences were evaluated using one-way ANOVA with Tukey's multiple comparisons test. Differences between groups were considered significant with a p-value < 0.05. \* p < 0.05; \*\*\* p < 0.005; \*\*\*\* p < 0.001. Size bar = 200  $\mu\text{m}$ .



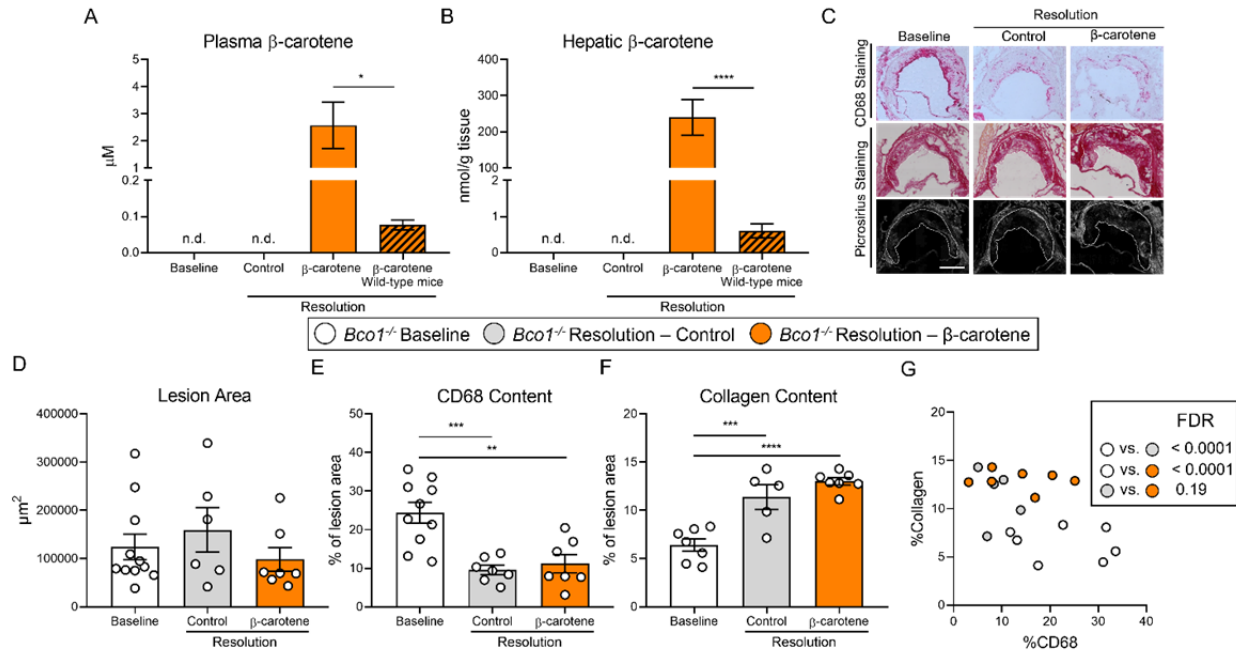

549  
 550 **Figure 3.  $\beta$ -carotene supplementation does alter atherosclerosis resolution in  $\beta$ -carotene**  
 551 **oxygenase 1-deficient (*Bco1*<sup>-/-</sup>) mice infused with ASO-LDLR.** Four-week-old male and  
 552 female *Bco1*<sup>-/-</sup> mice were fed a purified Western diet deficient in vitamin A (WD-VAD) and  
 553 injected with antisense oligonucleotide targeting the low-density lipoprotein receptor (ASO-  
 554 LDLR) once a week for 16 weeks to induce the development of atherosclerosis. After 16 weeks,  
 555 a group of mice was harvested (Baseline) and the rest of the mice were injected once with sense  
 556 oligonucleotide (SO-LDLR) to block ASO-LDLR (Resolution). Mice undergoing resolution  
 557 were either kept on the same diet (Resolution-Control) or switched to a Western diet  
 558 supplemented with 50 mg/kg of  $\beta$ -carotene (Resolution-  $\beta$ -carotene) for three more weeks. (A)  
 559  $\beta$ -carotene levels in plasma and (B) liver at the sacrifice determined by HPLC. (C)  
 560 Representative images for macrophage (CD68<sup>+</sup>, top panels), and picrosirius staining to identify  
 561 collagen using the bright-field (middle panels) or polarized light (bottom panels). (D) Plaque  
 562 size, (E) relative CD68 content, and (F) collagen content in the lesion. (G) Descriptive  
 563 discriminant analysis employing the relative CD68 and collagen contents in the lesion as  
 564 variables highlighting the FDR for each comparison. Each dot in the plot represents an individual  
 565 mouse (n = 5 to 11/group). (A-F) Values are represented as means  $\pm$  SEM. Statistical differences  
 566 were evaluated using one-way ANOVA with Tukey's multiple comparisons test. Differences  
 567 between groups were considered significant with a p-value < 0.05. \* p < 0.05; \*\* p < 0.01; \*\*\* p  
 568 < 0.005; \*\*\*\* p < 0.001. Size bar = 200  $\mu$ m.

569

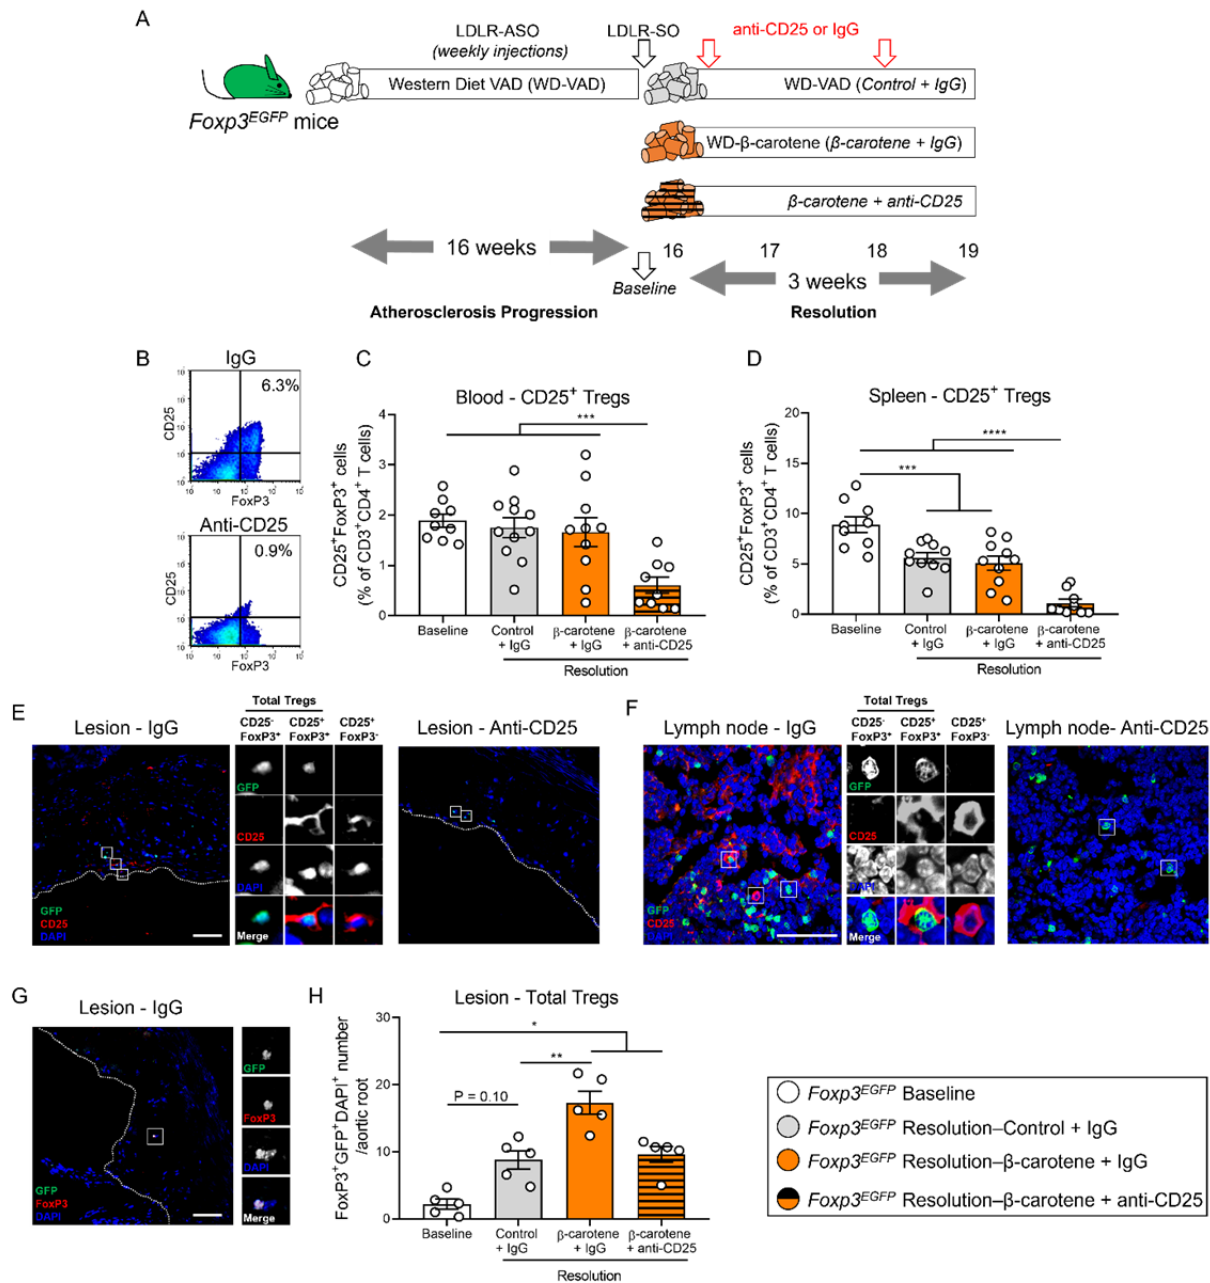

570

571 **Figure 4. Effect of anti-CD25 treatment on Treg number.** (A) Four-week-old male and female  
 572 mice expressing enhanced green fluorescence protein (EGFP) under the control of the forkhead  
 573 box P3 (*Foxp3*) promoter (*Foxp3*<sup>EGFP</sup> mice) were fed a purified Western diet deficient in vitamin  
 574 A (WD-VAD) and injected with antisense oligonucleotide targeting the low-density lipoprotein  
 575 receptor (ASO-LDLR) once a week for 16 weeks to induce the development of atherosclerosis.  
 576 After 16 weeks, a group of mice was harvested (Baseline) and the rest of the mice were injected

577 once with sense oligonucleotide (SO-LDLR) to block ASO-LDLR (Resolution). Mice  
578 undergoing resolution were either kept on the same diet (Resolution-Control) or switched to a  
579 Western diet supplemented with 50 mg/kg of  $\beta$ -carotene (Resolution-  $\beta$ -carotene) for three more  
580 weeks. An additional group of mice fed with  $\beta$ -carotene was injected twice before sacrifice with  
581 anti-CD25 monoclonal antibody to deplete Treg (Resolution- $\beta$ -carotene+anti-CD25). The rest of  
582 the resolution groups were injected with IgG isotype control antibody. **(B)** Representative flow  
583 cytometry panels showing splenic CD25<sup>+</sup>FoxP3<sup>+</sup> (CD25<sup>+</sup> Treg) cells in mice injected with IgG or  
584 anti-CD25. **(C)** Quantification of the splenic and **(D)** circulating blood levels of CD25<sup>+</sup> Treg  
585 cells determined by flow cytometry. **(E)** Representative confocal images show the presence of  
586 total Tregs (CD25<sup>-</sup>FoxP3<sup>+</sup> + CD25<sup>+</sup> Tregs) and CD25<sup>+</sup>FoxP3<sup>-</sup> T cells in the lesion of mice  
587 injected with IgG (left panel) or anti-CD25 (right panel). **(F)** Representative confocal images  
588 show the presence of total Tregs and CD25<sup>+</sup>FoxP3<sup>-</sup> T cells in lymph nodes of mice injected with  
589 IgG (left panel) or anti-CD25 (right panel). quantification of CD25<sup>+</sup> Tregs in the lesions. **(G)**  
590 Representative confocal image and **(H)** quantification of total Tregs in the lesion. Each dot in the  
591 plot represents an individual mouse (n = 5 to 11 mice/group). Values are represented as means  $\pm$   
592 SEM. Statistical differences were evaluated using one-way ANOVA with Tukey's multiple  
593 comparisons test. Differences between groups were considered significant with a p-value < 0.05.  
594 \* p < 0.05; \*\* p < 0.01; \*\*\* p < 0.005; \*\*\*\* p < 0.001.

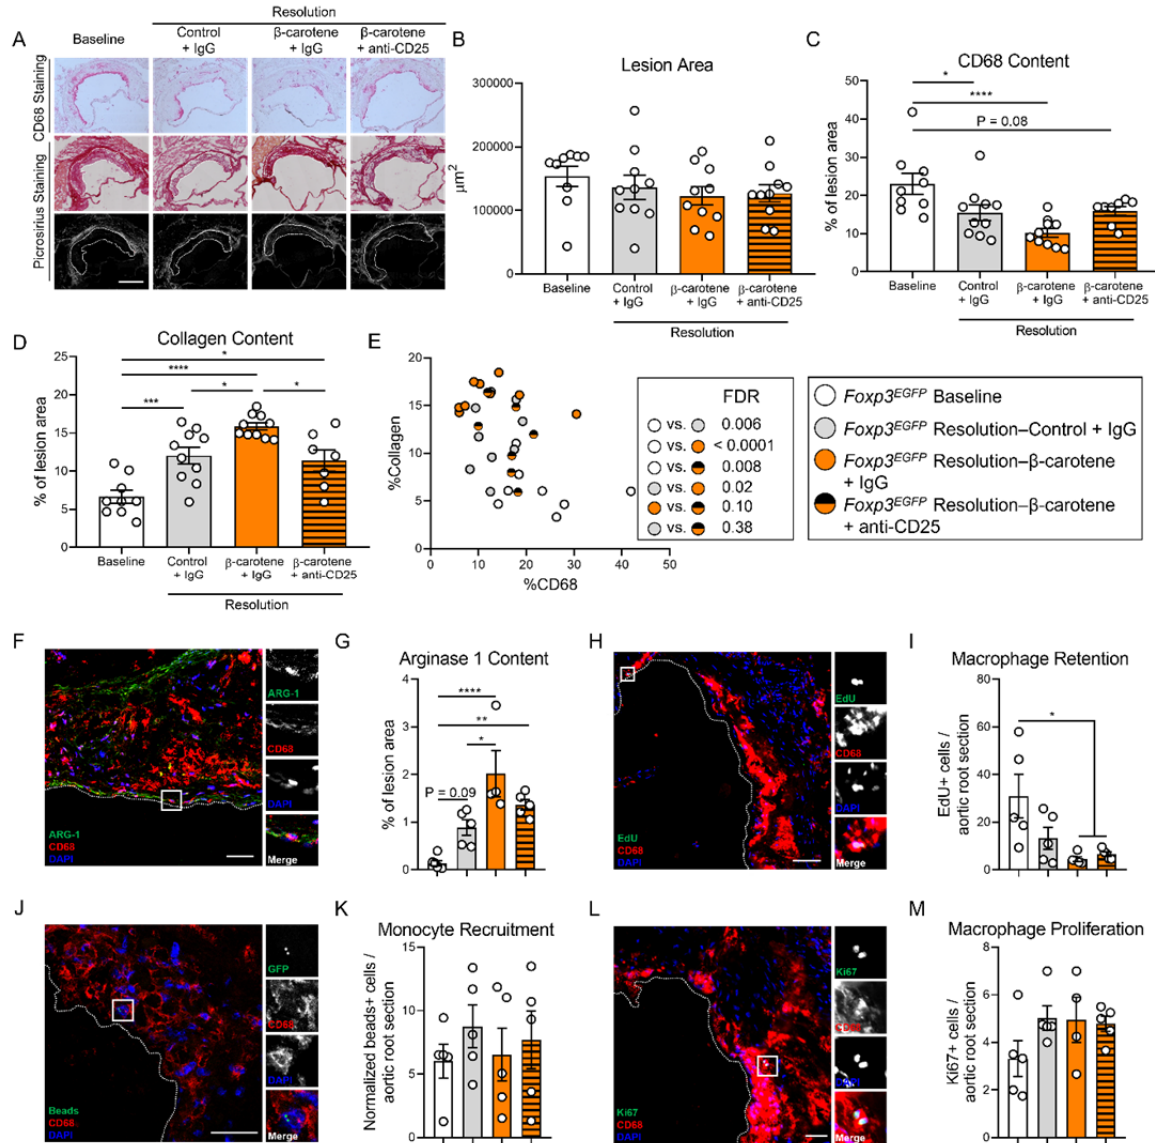

595  
 596 **Figure 5. Effect of anti-CD25 treatment on lesion composition and monocyte/macrophage**  
 597 **trafficking.** Four-week-old male and female expressing enhanced green fluorescence protein  
 598 (EGFP) under the control of the forkhead box P3 (*Foxp3*) promoter (*Foxp3*<sup>EGFP</sup> mice) were fed a  
 599 purified Western diet deficient in vitamin A (WD-VAD) and injected with antisense  
 600 oligonucleotide targeting the low-density lipoprotein receptor (ASO-LDLR) once a week for 16  
 601 weeks to induce the development of atherosclerosis. After 16 weeks, a group of mice was  
 602 harvested (Baseline) and the rest of the mice were injected once with sense oligonucleotide (SO-  
 603 LDLR) to block ASO-LDLR (Resolution). Mice undergoing resolution were either kept on the  
 604 same diet (Resolution-Control) or switched to a Western diet supplemented with 50 mg/kg of  $\beta$ -  
 605 carotene (Resolution-  $\beta$ -carotene) for three more weeks. An additional group of mice fed with  $\beta$ -

606 carotene was injected twice before sacrifice with anti-CD25 monoclonal antibody to deplete Treg  
607 (Resolution- $\beta$ -carotene+anti-CD25). The rest of the resolution groups were injected with IgG  
608 isotype control antibody. To quantify macrophage egress and monocyte recruitment, we injected  
609 a dose of EdU at week 15 and fluorescently labeled beads two days before harvesting the mice,  
610 respectively (see methods for details). **(A)** Representative images for macrophage (CD68+, top  
611 panels), and picrosirius staining to identify collagen using the bright-field (middle panels) or  
612 polarized light (bottom panels). Size bar = 200  $\mu$ m. **(B)** Plaque size, **(C)** relative CD68 content,  
613 and **(D)** collagen content in the lesion. **(E)** Descriptive discriminant analysis employing the  
614 relative CD68 and collagen contents in the lesion as variables highlighting the FDR for each  
615 comparison. **(F)** Representative confocal image showing arginase 1 (green), CD68 (red), and  
616 DAPI (blue) in the lesion. **(G)** relative arginase 1 area in the lesion. **(H)** EdU+ macrophages were  
617 identified by the colocalization of EdU (green) and DAPI (blue) in CD68+ (red) cells. **(I)**  
618 Number of EdU+ macrophages in the lesion. **(J)** Newly recruited monocytes were identified, and  
619 **(K)** quantified by the presence of beads (green) on the lesion. **(L)** Macrophages proliferating in  
620 the lesion were identified by the colocalization of Ki67 (green) and DAPI (blue) in CD68+ (red)  
621 cells. **(M)** Number of Ki67+ macrophages in the lesion. Size bars = 50  $\mu$ m. Each dot in the plot  
622 represents an individual mouse (n = 5 to 11 mice/group). Values are represented as means  $\pm$   
623 SEM. Statistical differences were evaluated using one-way ANOVA with Tukey's multiple  
624 comparisons test. Differences between groups were considered significant with a p-value < 0.05.  
625 \* p < 0.05; \*\* p < 0.01; \*\*\* p < 0.005; \*\*\*\* p < 0.001.

626  
627  
628

629

630

631

632

633

634

635

636  
637

## Supplementary Figures

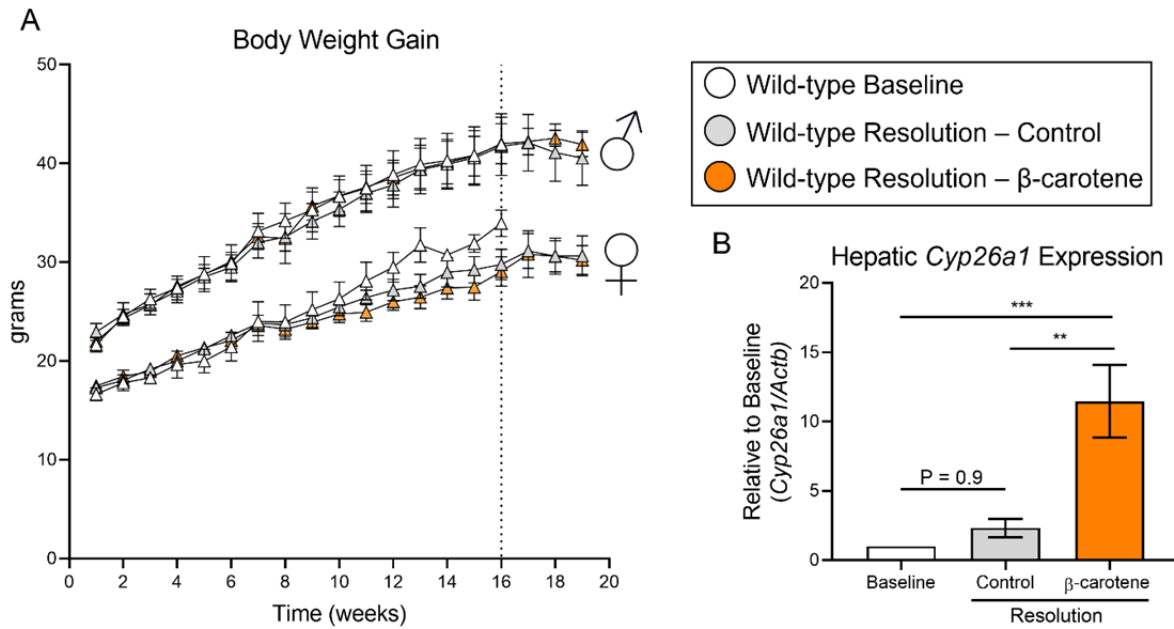

638

639 **Supplementary Figure 1.** Four-week-old male and female wild-type mice were fed a purified  
640 Western diet deficient in vitamin A (WD-VAD) and injected with antisense oligonucleotide  
641 targeting the low-density lipoprotein receptor (ASO-LDLR) once a week for 16 weeks to induce  
642 atherosclerosis. After 16 weeks (dotted line), a group of mice was harvested (Baseline) and the  
643 rest of the mice were injected once with sense oligonucleotide (SO-LDLR) to inactivate ASO-  
644 LDLR and promote atherosclerosis resolution. Mice undergoing resolution were either kept on  
645 the same diet (Resolution - Control) or switched to a Western diet supplemented with 50 mg/kg  
646 of  $\beta$ -carotene (Resolution -  $\beta$ -carotene) for three more weeks. **(A)** body weight progression, and  
647 **(B)** hepatic expression mRNA expression for *Cyp26a1* referred to *Actb* as a housekeeping control.  
648 N = 5 to 10 mice/group, Values are represented as means  $\pm$  SEM. Statistical differences were  
649 evaluated using one-way ANOVA with Tukey's multiple comparisons test. Differences between  
650 groups were considered significant with a p-value < 0.05. \*\* p < 0.01; \*\*\* p < 0.005.

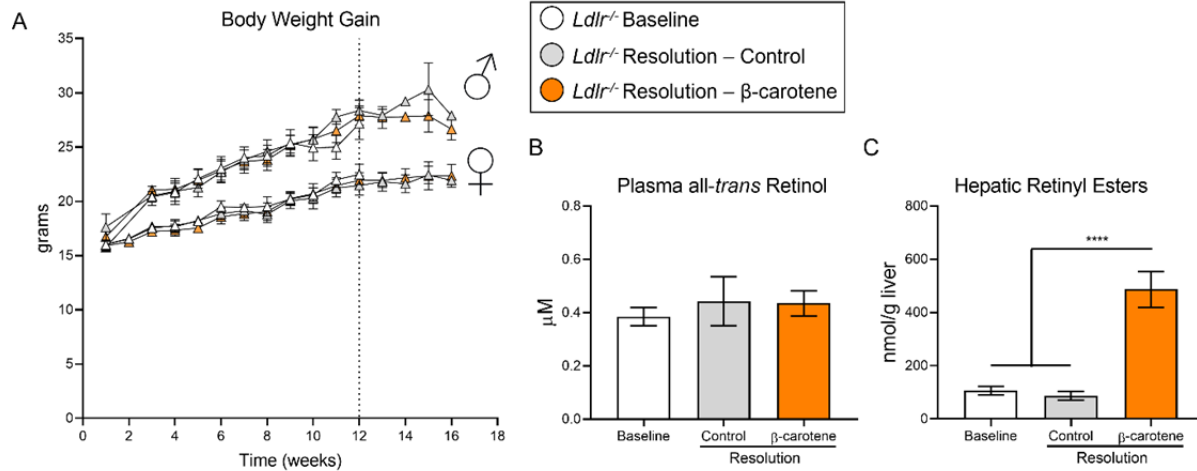

651  
652 **Supplementary Figure 2.** Four-week-old male and female *Ldlr*<sup>-/-</sup> mice were fed a purified  
653 Western diet deficient in vitamin A (WD-VAD) for 12 weeks to induce atherosclerosis. After 12  
654 weeks (dotted line), a group of mice was harvested (Baseline) and the rest of the mice were  
655 switched to a Standard diet (Resolution-Control) or the same diet supplemented with 50 mg/kg  
656 of  $\beta$ -carotene (Resolution- $\beta$ -carotene) for four more weeks. (A) body weight progression. (B)  
657 circulating vitamin A (all-*trans* retinol), and (C) hepatic retinyl ester stores. N = 5 to 10  
658 mice/group, Values are represented as means  $\pm$  SEM. Statistical differences were evaluated using  
659 one-way ANOVA with Tukey's multiple comparisons test. Differences between groups were  
660 considered significant with a p-value < 0.05. \*\*\*\* p < 0.001.

661  
662  
663  
664  
665  
666  
667  
668

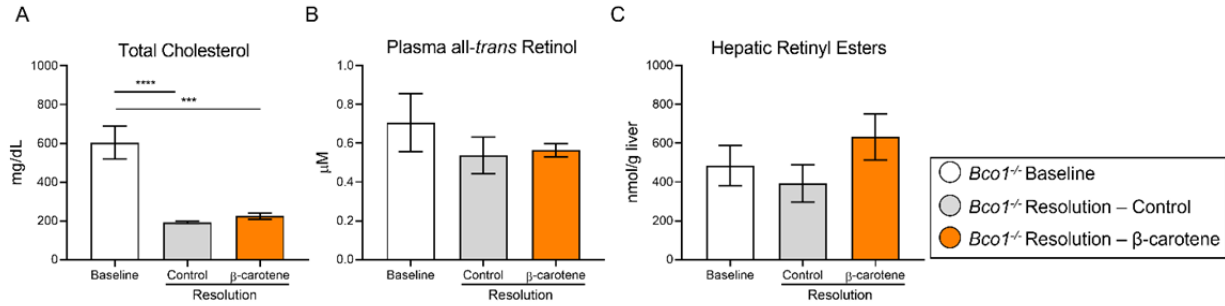

669

670 **Supplementary Figure 3.** Four-week-old male and female *Bco1*<sup>-/-</sup> mice were fed a purified  
671 Western diet deficient in vitamin A (WD-VAD) and injected with antisense oligonucleotide  
672 targeting the low-density lipoprotein receptor (ASO-LDLR) once a week for 16 weeks to induce  
673 the development of atherosclerosis. After 16 weeks, a group of mice was harvested (Baseline)  
674 and the rest of the mice were injected once with sense oligonucleotide (SO-LDLR) to block  
675 ASO-LDLR (Resolution). Mice undergoing resolution were either kept on the same diet  
676 (Resolution-Control) or switched to a Western diet supplemented with 50 mg/kg of β-carotene  
677 (Resolution- β-carotene) for three more weeks. (A) Total plasma cholesterol, and (B) vitamin A  
678 (all-*trans* retinol). (C) Hepatic vitamin A (retinyl ester) stores. N = 5 to 10 mice/group, Values  
679 are represented as means ± SEM. Statistical differences were evaluated using one-way ANOVA  
680 with Tukey's multiple comparisons test. Differences between groups were considered significant  
681 with a p-value < 0.05. \*\*\* p < 0.005, \*\*\*\* p < 0.001.

682

683



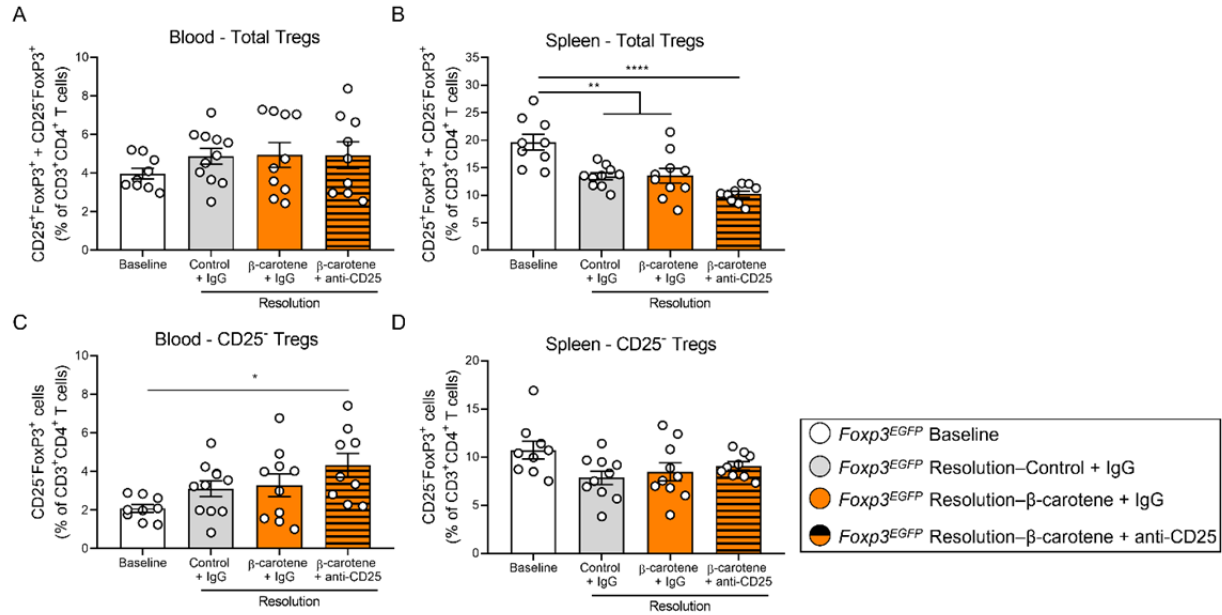

684

685 **Supplementary Figure 4.** Four-week-old male and female mice expressing enhanced green  
686 fluorescence protein (EGFP) under the control of the forkhead box P3 (*Foxp3*) promoter  
687 (*Foxp3*<sup>EGFP</sup> mice) were fed a purified Western diet deficient in vitamin A (WD-VAD) and  
688 injected with antisense oligonucleotide targeting the low-density lipoprotein receptor (ASO-  
689 LDLR) once a week for 16 weeks to induce the development of atherosclerosis. After 16 weeks,  
690 a group of mice was harvested (Baseline) and the rest of the mice were injected once with sense  
691 oligonucleotide (SO-LDLR) to block ASO-LDLR (Resolution). Mice undergoing resolution  
692 were either kept on the same diet (Resolution-Control) or switched to a Western diet  
693 supplemented with 50 mg/kg of β-carotene (Resolution- β-carotene) for three more weeks. An  
694 additional group of mice fed with β-carotene was injected twice before sacrifice with anti-CD25  
695 monoclonal antibody to deplete Treg (Resolution-β-carotene+anti-CD25). The rest of the  
696 resolution groups were injected with IgG isotype control antibody. **(A)** Quantification of the  
697 circulating and **(B)** splenic CD25<sup>+</sup>FoxP3<sup>+</sup> and CD25<sup>-</sup>FoxP3<sup>+</sup> (Total Tregs) measured by flow  
698 cytometry. **(C)** Circulating and **(D)** splenic CD25<sup>+</sup>FoxP3<sup>+</sup> Tregs. N = 9 to 10 mice/group. Values  
699 are represented as means ± SEM. Statistical differences were evaluated using one-way ANOVA  
700 with Tukey's multiple comparisons test. Differences between groups were considered significant  
701 with a p-value < 0.05. \* p < 0.05.

702

703

704 **Supplementary Table 1.** Composition of the experimental diets utilized in the study.

| <b>Ingredient</b>                                                            | <b>WD-VAD<br/>(g/kg diet)</b> | <b>WD-<math>\beta</math>-carotene<br/>(g/kg diet)</b> | <b>Standard-VAD<br/>(g/kg diet)</b> | <b>Standard-<math>\beta</math>-carotene<br/>(g/kg diet)</b> |
|------------------------------------------------------------------------------|-------------------------------|-------------------------------------------------------|-------------------------------------|-------------------------------------------------------------|
| <b>Casein</b>                                                                | 200                           | 200                                                   | 200                                 | 200                                                         |
| <b>L-Cysteine</b>                                                            | 3                             | 3                                                     | 3                                   | 3                                                           |
| <b>Corn starch</b>                                                           | 72.8                          | 72.8                                                  | 319                                 | 319                                                         |
| <b>Maltodextrin</b>                                                          | 100                           | 100                                                   | 100                                 | 100                                                         |
| <b>Sucrose</b>                                                               | 212                           | 212                                                   | 212                                 | 212                                                         |
| <b>Cellulose</b>                                                             | 50                            | 50                                                    | 50                                  | 50                                                          |
| <b>Soybean oil</b>                                                           | 25                            | 25                                                    | 70                                  | 70                                                          |
| <b>Lard</b>                                                                  | 160                           | 160                                                   | 0                                   | 0                                                           |
| <b>t-Butylhydroquinone</b>                                                   | 0                             | 0                                                     | 0                                   | 0                                                           |
| <b>Choline bitartrate</b>                                                    | 2                             | 2                                                     | 2                                   | 2                                                           |
| <b>Dicalcium phosphate</b>                                                   | 13                            | 13                                                    | 13                                  | 13                                                          |
| <b>Calcium carbonate</b>                                                     | 5.5                           | 5.5                                                   | 5.5                                 | 5.5                                                         |
| <b>Potassium citrate monohydrate</b>                                         | 16.5                          | 16.5                                                  | 16.5                                | 16.5                                                        |
| <b>Cholesterol</b>                                                           | 3.08                          | 3.08                                                  | 0                                   | 0                                                           |
| <b>Mineral mix</b>                                                           | 10                            | 10                                                    | 35                                  | 35                                                          |
| <b>Vitamin mix, no added vitamin A</b>                                       | 10                            | 10                                                    | 10                                  | 10                                                          |
| <b>Placebo beadlets</b>                                                      | 0.5                           | 0                                                     | 0.5                                 | 0                                                           |
| <b><math>\beta</math>-carotene beadlets, 10% <math>\beta</math>-carotene</b> | 0                             | 0.5                                                   | 0                                   | 0.5                                                         |

705  
706 <sup>1</sup> **Footnotes.** IU: International unit. WD, Western diet; VAD; Vitamin A deficient; IU,  
707 international units.

708  
709  
710  
711  
712  
713  
714  
715  
716  
717

## 718 REFERENCES

- 719 1. Newby, A.C., et al., *Vulnerable atherosclerotic plaque metalloproteinases and foam cell*  
720 *phenotypes*. Thrombosis and haemostasis, 2009. **101**(6): p. 1006-1011.
- 721 2. Goldberg, I.J., G. Sharma, and E.A. Fisher, *Atherosclerosis: Making a U Turn*. Annu Rev  
722 Med, 2020. **71**: p. 191-201.
- 723 3. Andersson, J., P. Libby, and G.K. Hansson, *Adaptive immunity and atherosclerosis*.  
724 Clinical Immunology, 2010. **134**(1): p. 33-46.
- 725 4. Witztum, J.L. and A.H. Lichtman, *The influence of innate and adaptive immune*  
726 *responses on atherosclerosis*. Annual review of pathology, 2014. **9**: p. 73-102.
- 727 5. Onda, M., K. Kobayashi, and I. Pastan, *Depletion of regulatory T cells in tumors with an*  
728 *anti-CD25 immunotoxin induces CD8 T cell-mediated systemic antitumor immunity*. Proc  
729 Natl Acad Sci U S A, 2019. **116**(10): p. 4575-4582.
- 730 6. Sharma, M., et al., *Regulatory T Cells License Macrophage Pro-Resolving Functions*  
731 *During Atherosclerosis Regression*. Circ Res, 2020. **127**(3): p. 335-353.
- 732 7. Couper, K.N., et al., *Incomplete depletion and rapid regeneration of Foxp3+ regulatory*  
733 *T cells following anti-CD25 treatment in malaria-infected mice*. J Immunol, 2007.  
734 **178**(7): p. 4136-46.
- 735 8. Fontenot, J.D., et al., *Regulatory T cell lineage specification by the forkhead*  
736 *transcription factor foxp3*. Immunity, 2005. **22**(3): p. 329-41.
- 737 9. Elias, K.M., et al., *Retinoic acid inhibits Th17 polarization and enhances FoxP3*  
738 *expression through a Stat-3/Stat-5 independent signaling pathway*. Blood, 2008. **111**(3):  
739 p. 1013-20.
- 740 10. von Lintig, J. and K. Vogt, *Filling the gap in vitamin A research. Molecular*  
741 *identification of an enzyme cleaving beta-carotene to retinal*. J Biol Chem, 2000.  
742 **275**(16): p. 11915-20.
- 743 11. Hessel, S., et al., *CMO1 deficiency abolishes vitamin A production from beta-carotene*  
744 *and alters lipid metabolism in mice*. J Biol Chem, 2007. **282**(46): p. 33553-61.
- 745 12. Amengual, J., et al., *Two carotenoid oxygenases contribute to mammalian provitamin A*  
746 *metabolism*. J Biol Chem, 2013. **288**(47): p. 34081-96.
- 747 13. Amengual, J., et al., *Beta-carotene reduces body adiposity of mice via BCMO1*. PLoS  
748 One, 2011. **6**(6): p. e20644.
- 749 14. Lobo, G.P., et al., *Beta,beta-carotene decreases peroxisome proliferator receptor gamma*  
750 *activity and reduces lipid storage capacity of adipocytes in a beta,beta-carotene*  
751 *oxygenase 1-dependent manner*. J Biol Chem, 2010. **285**(36): p. 27891-9.
- 752 15. Zhou, F., et al., *beta-carotene conversion to vitamin A delays atherosclerosis progression*  
753 *by decreasing hepatic lipid secretion in mice*. J Lipid Res, 2020.
- 754 16. Coronel, J., et al., *The conversion of beta-carotene to vitamin A in adipocytes drives the*  
755 *anti-obesogenic effects of beta-carotene in mice*. Mol Metab, 2022: p. 101640.
- 756 17. Amengual, J., et al., *beta-Carotene Oxygenase 1 Activity Modulates Circulating*  
757 *Cholesterol Concentrations in Mice and Humans*. J Nutr, 2020.
- 758 18. Amengual, J., et al., *Short-Term Acyl-CoA:Cholesterol Acyltransferase Inhibition,*  
759 *Combined with Apoprotein A1 Overexpression, Promotes Atherosclerosis Inflammation*  
760 *Resolution in Mice*. Mol Pharmacol, 2021. **99**(3): p. 175-183.
- 761 19. Josefs, T., et al., *Atherosclerosis Regression and Cholesterol Efflux in*  
762 *Hypertriglyceridemic Mice*. Circ Res, 2021. **128**(6): p. 690-705.

- 763 20. Josefs, T., et al., *Neutrophil extracellular traps promote macrophage inflammation and*  
764 *impair atherosclerosis resolution in diabetic mice*. JCI Insight, 2020. **5**(7).
- 765 21. Barrett, T.J., et al., *Apolipoprotein AI Promotes Atherosclerosis Regression in Diabetic*  
766 *Mice by Suppressing Myelopoiesis and Plaque Inflammation*. Circulation, 2019. **140**(14):  
767 p. 1170-1184.
- 768 22. Basu, D., et al., *Novel Reversible Model of Atherosclerosis and Regression Using*  
769 *Oligonucleotide Regulation of the LDL Receptor*. Circulation Research, 2018. **122**(4): p.  
770 560-567.
- 771 23. Weinstock, A. and E.A. Fisher, *Methods to Study Monocyte and Macrophage Trafficking*  
772 *in Atherosclerosis Progression and Resolution*. Methods Mol Biol, 2019. **1951**: p. 153-  
773 165.
- 774 24. Benjamini, Y., et al., *Controlling the false discovery rate in behavior genetics research*.  
775 Behav Brain Res, 2001. **125**(1-2): p. 279-84.
- 776 25. Emoto, Y., et al., *Retinoic acid-metabolizing enzyme Cyp26a1 is essential for*  
777 *determining territories of hindbrain and spinal cord in zebrafish*. Dev Biol, 2005. **278**(2):  
778 p. 415-27.
- 779 26. Abu-Abed, S., et al., *Differential expression of the retinoic acid-metabolizing enzymes*  
780 *CYP26A1 and CYP26B1 during murine organogenesis*. Mech Dev, 2002. **110**(1-2): p.  
781 173-7.
- 782 27. Basu, D., et al., *Novel Reversible Model of Atherosclerosis and Regression Using*  
783 *Oligonucleotide Regulation of the LDL Receptor*. Circ Res, 2018. **122**(4): p. 560-567.
- 784 28. Libby, P. and M. Aikawa, *Stabilization of atherosclerotic plaques: New mechanisms and*  
785 *clinical targets*. Nature Medicine, 2002. **8**(11): p. 1257-1262.
- 786 29. Soehnlein, O. and P. Libby, *Targeting inflammation in atherosclerosis - from*  
787 *experimental insights to the clinic*. Nat Rev Drug Discov, 2021. **20**(8): p. 589-610.
- 788 30. Yu, M., et al., *Targeted Nanotherapeutics Encapsulating Liver X Receptor Agonist*  
789 *GW3965 Enhance Antiatherogenic Effects without Adverse Effects on Hepatic Lipid*  
790 *Metabolism in Ldlr(-/-) Mice*. Adv Healthc Mater, 2017. **6**(20).
- 791 31. Gundra, U.M., et al., *Vitamin A mediates conversion of monocyte-derived macrophages*  
792 *into tissue-resident macrophages during alternative activation*. Nat Immunol, 2017.  
793 **18**(6): p. 642-653.
- 794 32. Ouimet, M., et al., *MicroRNA-33-dependent regulation of macrophage metabolism*  
795 *directs immune cell polarization in atherosclerosis*. J Clin Invest, 2015. **125**(12): p. 4334-  
796 48.
- 797 33. Gundra, U.M., et al., *Alternatively activated macrophages derived from monocytes and*  
798 *tissue macrophages are phenotypically and functionally distinct*. Blood, 2014. **123**(20): p.  
799 e110-22.
- 800 34. Girgis, N.M., et al., *Ly6Chigh monocytes become alternatively activated macrophages in*  
801 *schistosome granulomas with help from CD4+ cells*. PLoS Pathog, 2014. **10**(6): p.  
802 e1004080.
- 803 35. Girgis, N.M., U.M. Gundra, and P. Loke, *Immune regulation during helminth infections*.  
804 PLoS Pathog, 2013. **9**(4): p. e1003250.
- 805 36. Broadhurst, M.J., et al., *Upregulation of retinal dehydrogenase 2 in alternatively*  
806 *activated macrophages during retinoid-dependent type-2 immunity to helminth infection*  
807 *in mice*. PLoS Pathog, 2012. **8**(8): p. e1002883.

- 808 37. Foks, A.C., A.H. Lichtman, and J. Kuiper, *Treating atherosclerosis with regulatory T*  
809 *cells*. *Arterioscler Thromb Vasc Biol*, 2015. **35**(2): p. 280-7.
- 810 38. Ait-Oufella, H., et al., *Natural regulatory T cells control the development of*  
811 *atherosclerosis in mice*. *Nat Med*, 2006. **12**(2): p. 178-80.
- 812 39. Haribhai, D., et al., *Regulatory T cells dynamically control the primary immune response*  
813 *to foreign antigen*. *J Immunol*, 2007. **178**(5): p. 2961-72.
- 814 40. Hayes, E.T., et al., *Regulatory T Cells Maintain Selective Access to IL-2 and Immune*  
815 *Homeostasis despite Substantially Reduced CD25 Function*. *J Immunol*, 2020. **205**(10):  
816 p. 2667-2678.
- 817 41. Moore, K.J., et al., *Macrophage Trafficking, Inflammatory Resolution, and Genomics in*  
818 *Atherosclerosis: JACC Macrophage in CVD Series (Part 2)*. *J Am Coll Cardiol*, 2018.  
819 **72**(18): p. 2181-2197.
- 820 42. Yurdagul, A., Jr., et al., *Macrophage Metabolism of Apoptotic Cell-Derived Arginine*  
821 *Promotes Continual Efferocytosis and Resolution of Injury*. *Cell Metab*, 2020. **31**(3): p.  
822 518-533 e10.
- 823 43. Pinos, I., et al., *Functional characterization of interleukin 4 and retinoic acid signaling*  
824 *crossstalk during alternative macrophage activation*. *Biochim Biophys Acta Mol Cell*  
825 *Biol Lipids*, 2023: p. 159291.
- 826 44. Relevy, N.Z., et al., *Vitamin A-deficient diet accelerated atherogenesis in apolipoprotein*  
827 *E(-/-) mice and dietary beta-carotene prevents this consequence*. *Biomed Res Int*, 2015.  
828 **2015**: p. 758723.
- 829 45. Harari, A., et al., *A 9-cis beta-carotene-enriched diet inhibits atherogenesis and fatty*  
830 *liver formation in LDL receptor knockout mice*. *J Nutr*, 2008. **138**(10): p. 1923-30.
- 831 46. Shaish, A., et al., *Beta-carotene inhibits atherosclerosis in hypercholesterolemic rabbits*.  
832 *J Clin Invest*, 1995. **96**(4): p. 2075-82.
- 833 47. Grune, T., et al., *Beta-carotene is an important vitamin A source for humans*. *J Nutr*,  
834 2010. **140**(12): p. 2268S-2285S.
- 835 48. Coronel, J., I. Pinos, and J. Amengual, *beta-carotene in Obesity Research: Technical*  
836 *Considerations and Current Status of the Field*. *Nutrients*, 2019. **11**(4).
- 837 49. Lobo, G.P., et al., *Genetics and diet regulate vitamin A production via the homeobox*  
838 *transcription factor ISX*. *J Biol Chem*, 2013. **288**(13): p. 9017-27.
- 839 50. Seino, Y., et al., *Isx participates in the maintenance of vitamin A metabolism by*  
840 *regulation of beta-carotene 15,15'-monooxygenase (Bcmol) expression*. *J Biol Chem*,  
841 2008. **283**(8): p. 4905-11.
- 842 51. Clifford, A.J., et al., *Single nucleotide polymorphisms in CETP, SLC46A1, SLC19A1,*  
843 *CD36, BCMO1, APOA5, and ABCA1 are significant predictors of plasma HDL in*  
844 *healthy adults*. *Lipids Health Dis*, 2013. **12**: p. 66.
- 845 52. Yabuta, S., et al., *Common SNP rs6564851 in the BCO1 Gene Affects the Circulating*  
846 *Levels of beta-Carotene and the Daily Intake of Carotenoids in Healthy Japanese*  
847 *Women*. *PLoS One*, 2016. **11**(12): p. e0168857.
- 848 53. Moran, N.E., et al., *Single Nucleotide Polymorphisms in beta-Carotene Oxygenase 1 are*  
849 *Associated with Plasma Lycopene Responses to a Tomato-Soy Juice Intervention in Men*  
850 *with Prostate Cancer*. *J Nutr*, 2019. **149**(3): p. 381-397.
- 851 54. Lietz, G., et al., *Single nucleotide polymorphisms upstream from the beta-carotene*  
852 *15,15'-monooxygenase gene influence provitamin A conversion efficiency in female*  
853 *volunteers*. *J Nutr*, 2012. **142**(1): p. 161S-5S.

- 854 55. Leon-Reyes, G., et al., *Common variant rs6564851 near the beta-carotene oxygenase 1*  
855 *gene is associated with plasma triglycerides levels in middle-aged Mexican men adults.*  
856 *Nutr Res*, 2022. **103**: p. 30-39.
- 857 56. Rodriguez-Concepcion, M., et al., *A global perspective on carotenoids: Metabolism,*  
858 *biotechnology, and benefits for nutrition and health.* *Prog Lipid Res*, 2018. **70**: p. 62-93.
- 859 57. Bonet, M.L., et al., *Carotenoids and carotenoid conversion products in adipose tissue*  
860 *biology and obesity: Pre-clinical and human studies.* *Biochim Biophys Acta Mol Cell*  
861 *Biol Lipids*, 2020: p. 158676.
- 862 58. Amengual, J., et al., *Retinoic Acid Increases Fatty Acid Oxidation and Irisin Expression*  
863 *in Skeletal Muscle Cells and Impacts Irisin In Vivo.* *Cell Physiol Biochem*, 2018. **46**(1):  
864 p. 187-202.
- 865 59. Granados, N., et al., *Vitamin A supplementation in early life affects later response to an*  
866 *obesogenic diet in rats.* *Int J Obes (Lond)*, 2013. **37**(9): p. 1169-76.
- 867 60. Amengual, J., et al., *Induction of carnitine palmitoyl transferase 1 and fatty acid*  
868 *oxidation by retinoic acid in HepG2 cells.* *Int J Biochem Cell Biol*, 2012. **44**(11): p.  
869 2019-27.
- 870 61. Amengual, J., et al., *Retinoic acid treatment enhances lipid oxidation and inhibits lipid*  
871 *biosynthesis capacities in the liver of mice.* *Cell Physiol Biochem*, 2010. **25**(6): p. 657-66.
- 872 62. Amengual, J., et al., *Retinoic acid treatment increases lipid oxidation capacity in skeletal*  
873 *muscle of mice.* *Obesity (Silver Spring)*, 2008. **16**(3): p. 585-91.
- 874 63. Mercader, J., et al., *Remodeling of white adipose tissue after retinoic acid administration*  
875 *in mice.* *Endocrinology*, 2006. **147**(11): p. 5325-32.
- 876 64. Felipe, F., et al., *Effects of retinoic acid administration and dietary vitamin A*  
877 *supplementation on leptin expression in mice: lack of correlation with changes of adipose*  
878 *tissue mass and food intake.* *Biochim Biophys Acta*, 2005. **1740**(2): p. 258-65.
- 879 65. Felipe, F., et al., *Modulation of resistin expression by retinoic acid and vitamin A status.*  
880 *Diabetes*, 2004. **53**(4): p. 882-9.
- 881 66. Puigserver, P., et al., *In vitro and in vivo induction of brown adipocyte uncoupling*  
882 *protein (thermogenin) by retinoic acid.* *Biochem J*, 1996. **317** ( Pt 3): p. 827-33.
- 883 67. Berry, D.C. and N. Noy, *All-trans-retinoic acid represses obesity and insulin resistance*  
884 *by activating both PPAR{beta}/{delta} and RAR.* *Mol Cell Biol*, 2009.
- 885 68. Miller, A.P., J. Coronel, and J. Amengual, *The role of beta-carotene and vitamin A in*  
886 *atherogenesis: Evidences from preclinical and clinical studies.* *Biochim Biophys Acta*  
887 *Mol Cell Biol Lipids*, 2020: p. 158635.
- 888 69. He, L., et al., *Global characterization of macrophage polarization mechanisms and*  
889 *identification of M2-type polarization inhibitors.* *Cell Rep*, 2021. **37**(5): p. 109955.
- 890 70. Mucida, D., et al., *Reciprocal TH17 and regulatory T cell differentiation mediated by*  
891 *retinoic acid.* *Science*, 2007. **317**(5835): p. 256-60.
- 892 71. Hori, S., T. Nomura, and S. Sakaguchi, *Control of regulatory T cell development by the*  
893 *transcription factor Foxp3.* *Science*, 2003. **299**(5609): p. 1057-61.
- 894 72. Kane, M.A., et al., *Quantitative profiling of endogenous retinoic acid in vivo and in vitro*  
895 *by tandem mass spectrometry.* *Anal Chem*, 2008. **80**(5): p. 1702-8.
- 896 73. Ohue, Y. and H. Nishikawa, *Regulatory T (Treg) cells in cancer: Can Treg cells be a new*  
897 *therapeutic target?* *Cancer Sci*, 2019. **110**(7): p. 2080-2089.
- 898 74. Reboul, E., *Mechanisms of Carotenoid Intestinal Absorption: Where Do We Stand?*  
899 *Nutrients*, 2019. **11**(4).

900
